# Supplementary material for: User-Centred Design of a Final Results Report for Participants in Multi-Sensor Personal Air Pollution Exposure Monitoring Campaigns
Source: Preprints.org preprint supplement (doi:10.20944/preprints202110.0031.v2), 2021-11-04
Supplement: Supplementary file 1 [file S1_Data_analysis_after_review.xlsx]

## Sheet: Front page_info
Supplementary material 1.This excel file contains data and data analysis for the article "User-Centred Design of a Final Results Report for Participants in Multi-Sensor Personal Air Pollution Exposure Monitoring Campaigns" submitted in International Journal of Environmental Research and Public Health
Table of content
Table S1. Dataset on participant characteristics	p.1
Table S2. Education level	p.1
Table S3. Age	p.1
Table S4. Gender	p.1
Table S5. Annual income	p.1
Table S6. Underlying health conditions (yes/no)	p.1
Table S7. Underlying health condition (specific)	p.1
Table S8. Pregnancy	p.1
Table S9. Do you have cancer?	p.1
Table S10. If yes, please specify type of cancer	p.1
Table S11. Data on annual household income	p.2
Table S12. Annual household income	p.2
Table S13. Data analysis on visualization suggestions by coding	p.3
Table S14. Summary of visualization suggestions	p.3
Table S15. Raw data on user interest on pre-determined visualization suggestions	p.4
Table S16. Frequency table of user interest on pre-determined visualization suggestions	p.4
Table S17. Frequency % table of user interest on pre-determined visualization suggestions	p.4
Figure S1: User interest in context of visualization	p.4
Table S18. Data on surprices in the results	p.5
Table S19. Amount of participants who got surpriced by the results	p.5
Table S20. List of descriptions of surprices	p.5
Table S21. Data on evaluation of receieved results report	p.6
Table S22. Evaluation of received results report: general statistics	p.6
Table S23. Evaluation of received results report: understandability	p.6
Table S24. Evaluation of received results report: usability	p.6
Table S25. Evaluation of received results report: amount of information	p.6
Table S26. Data on further suggestions for improving the received results report	p.7
Table S27. List of further suggestions for improving the received results report	p.7
Table S28. Data on trust	p.7
Table S29. Frequency table on trust	p.7

## Sheet: p.1_individuals_I
Table S1. Dataset on participant characteristics
Individual ID	Household ID	City	Gender	Age	What is the highest level of education you have completed?	What is your annual income?	Do you suffer from any of the following?													Are you pregnant? (please select N/A if you are not a woman)	Do you have cancer?
Open-Ended Response	Open-Ended Response	Response	Response	Open-Ended Response	Response	Response	High blood pressure	Low blood pressure	Heart attack	Heart disease	Asthma	Allergies (e.g. pollen allergy)	Hay fever	Chronic obstructuve pulmonary disease	Diabetes	Influenza	Other (please specify)	(added later to count underlying health conditions)		Response	Response	Yes (please specify type of cancer)				Table S2. Education level
BSL_W_P052	BSL_W_H042	Basel	Female	34	Higher education	Upper 25%												0	0	No	No					What is the highest level of education you have completed?
BSL_W_P051	BSL_W_H037	Basel	Female	29	Higher education	Upper 25%												0	0	No	No						All ages				Only adults
BSL_W_P050	BSL_W_H033	Basel	Male	73	Higher education	Average (25-75%)	High blood pressure				Asthma						chronic obstructive pulmonary disease	3	1	N/A	No					Answer Choices	All cities	%	Ljubljana	%	All cities	%	Ljubljana	%
BSL_W_P048	BSL_W_H038	Basel	Female	34	Higher education	Upper 25%						Allergies (e.g. pollen allergy)	Hay fever					2	1	No	No					Primary education / Not completed secondary education	66	0.135246	8	0.115942	16	0.0372093	4	0.0615385
BSL_W_P046	BSL_W_H031	Basel	Male	31	Higher education	Upper 25%												0	0	N/A	No					Completed secondary education	107	0.219262	9	0.130435	101	0.234884	9	0.138462
BSL_W_P045	BSL_W_H031	Basel		27	Higher education	Upper 25%					Asthma	Allergies (e.g. pollen allergy)						2	1	No	No					Higher education	315	0.645492	52	0.753623	313	0.727907	52	0.8
BSL_W_P044	BSL_W_H035	Basel																0	0							Answered	488		69	0.945205	430	1	65	1
BSL_W_P043	BSL_W_H032	Basel																0	0							Skipped	53		4	0.0547945
BSL_W_P042	BSL_W_H032	Basel																0	0							all	541		73	1
BSL_W_P041	BSL_W_H030	Basel																0	0
BSL_W_P039	BSL_W_H029	Basel																0	0
BSL_W_P038	BSL_W_H028	Basel																0	0
BSL_W_P037	BSL_W_H027	Basel																0	0							Table S3. Age
BSL_W_P036	BSL_W_H027	Basel																0	0												average
BSL_W_P035	BSL_W_H026	Basel	Male	33	Higher education	Upper 25%												0	0	N/A	No					Age	All cities	%	Ljubljana	%	All cities	Ljubljana
BSL_W_P034	BSL_W_H026	Basel	Female	34	Higher education	Average (25-75%)												0	0	No	No					<18	77	0.151874	8	0.109589	38.1341	40.7534
BSL_W_P033	BSL_W_H025	Basel																0	0							18-64	398	0.78501	60	0.821918
BSL_W_P032	BSL_W_H024	Basel																0	0							>65	32	0.0631164	5	0.0684932
BSL_W_P031	BSL_W_H023	Basel	Male	58	Higher education	Upper 25%											sun allergy	1	1	N/A	No						507	1	73	1
BSL_W_P030	BSL_W_H023	Basel	Female	52	Higher education		High blood pressure											1	1	No	No
BSL_W_P029	BSL_W_H022	Basel																0	0
BSL_W_P028	BSL_W_H021	Basel																0	0
BSL_W_P027	BSL_W_H021	Basel	Male	27	Higher education	Lower 25%						Allergies (e.g. pollen allergy)	Hay fever					2	1	N/A	No					Table S4. Gender
BSL_W_P026	BSL_W_H043	Basel																0	0							Gender
BSL_W_P024	BSL_W_H019	Basel	Male	38	Completed secondary education	Upper 25%												0	0		No					Answer Choices	All cities	%	Ljubljana	%
BSL_W_P023	BSL_W_H018	Basel	Male	58	Higher education	Lower 25%												0	0	N/A						Male	242	0.473581	39	0.534247
BSL_W_P022	BSL_W_H018	Basel	Female		Higher education	Lower 25%						Allergies (e.g. pollen allergy)	Hay fever					2	1	No	No					Female	269	0.526419	34	0.465753
BSL_W_P021	BSL_W_H019	Basel																0	0							Other	0	0	0	0
BSL_W_P020	BSL_W_H017	Basel	Male														prostatic enlargement, osteoporosis, Parkinson's disease (early stage), Porokeratosis	1	1	N/A	No						511	1	73	1
BSL_W_P019	BSL_W_H016	Basel																0	0	N/A	No
BSL_W_P018	BSL_W_H015	Basel																0	0
BSL_W_P017	BSL_W_H014	Basel																0	0							Table S5. Annual income
BSL_W_P016	BSL_W_H013	Basel																0	0							What is your annual income?							Only adults			Only adults
BSL_W_P015	BSL_W_H011	Basel																0	0							Answer Choices	All cities	% of answered	% if unknown counted	Ljubljana	%	% if unknown counted	All cities	% of answered	% if unknown counted	Ljubljana	% of answered	% if unknown counted
BSL_W_P014	BSL_W_H012	Basel																0	0	N/A	No					Lower 25%	93	0.237852	0.171904	7	0.114754	0.0958904	86	0.228723	0.2	7	0.116667	0.107692
BSL_W_P013	BSL_W_H010	Basel																0	0							Average (25-75%)	189	0.483376	0.349353	38	0.622951	0.520548	183	0.486702	0.425581	37	0.616667	0.569231
BSL_W_P011	BSL_W_H008	Basel																0	0							Upper 25%	109	0.278772	0.201479	16	0.262295	0.219178	107	0.284574	0.248837	16	0.266667	0.246154
BSL_W_P009	BSL_W_H005	Basel																0	0							unknown	150	0.277264	0.277264	12	0.164384	0.164384	54	0.125581	0.125581	5	0.0769231	0.0769231
BSL_W_P008	BSL_W_H005	Basel																0	0							Answered	391	0.722736	1	61	1	0.835616	376	1	0.874419	60	1	0.923077
BSL_W_P007	BSL_W_H004	Basel																0	0							All	541			73			430		1	65		1
BSL_W_P006	BSL_W_H004	Basel																0	0
BSL_W_P005	BSL_W_H006	Basel	Male	28	Higher education	Average (25-75%)					Asthma	Allergies (e.g. pollen allergy)						2	1	N/A	No
BSL_W_P004	BSL_W_H003	Basel																0	0
BSL_W_P003	BSL_W_H007	Basel																0	0
BSL_W_P002	BSL_W_H002	Basel																0	0							Table S6. Underlying health conditions (yes/no)
BSL_W_P001	BSL_W_H001	Basel	Female	36	Higher education	Upper 25%												0	0	Yes	No
BSL_S_P048	BSL_S_H038	Basel	Female	34	Higher education	Upper 25%						Allergies (e.g. pollen allergy)	Hay fever					2	1	No	No										All cities	%	Ljubljana	%
BSL_S_P047	BSL_S_H031	Basel	Female	23	Higher education	Lower 25%						Allergies (e.g. pollen allergy)						1	1	No	No									individuals with one or more underlying health condition	194	0.358595	26	0.356164
BSL_S_P046	BSL_S_H031	Basel	Male	30	Higher education	Upper 25%												0	0	N/A	No									None reported	347	0.641405	47	0.643836
BSL_S_P045	BSL_S_H031	Basel	Female	27	Higher education	Upper 25%					Asthma	Allergies (e.g. pollen allergy)	Hay fever					3	1	No	No										541		73
BSL_S_P040	BSL_S_H045	Basel	Female	28	Higher education	Lower 25%												0	0	No	No
BSL_S_P044	BSL_S_H035	Basel	Female	39	Higher education	Average (25-75%)											migraine	1	1	No	No
BSL_S_P043	BSL_S_H032	Basel	Female	33	Higher education	Average (25-75%)						Allergies (e.g. pollen allergy)						1	1	No	No
BSL_S_P042	BSL_S_H032	Basel	Male	33	Higher education	Upper 25%						Allergies (e.g. pollen allergy)	Hay fever					2	1	N/A	No					Table S7. Underlying health condition (specific)
BSL_S_P041	BSL_S_H030	Basel	Female	42	Higher education	Average (25-75%)						Allergies (e.g. pollen allergy)	Hay fever					2	1	No	No					Do you suffer from any of the following?
BSL_S_P039	BSL_S_H029	Basel	Male	37	Higher education	Lower 25%												0	0	N/A	No						Answer Choices	frequency	% of those who suffer some	% of all
BSL_S_P038	BSL_S_H028	Basel	Female	32	Higher education	Upper 25%												0	0	No	No						High blood pressure	32	0.164948	0.0591497
BSL_S_P037	BSL_S_H027	Basel	Male	72	Higher education	Upper 25%	High blood pressure											1	1	N/A	No						Low blood pressure	25	0.128866	0.0462107
BSL_S_P036	BSL_S_H027	Basel	Female		Completed secondary education	Upper 25%											joint pain	1	1	No	No						Heart attack	3	0.0154639	0.00554529
BSL_S_P035	BSL_S_H026	Basel	Male	33	Higher education	Upper 25%												0	0	N/A	No						Heart disease	9	0.0463918	0.0166359
BSL_S_P034	BSL_S_H026	Basel	Female	34	Higher education	Upper 25%												0	0	No	No						Asthma	33	0.170103	0.0609982
BSL_S_P033	BSL_S_H025	Basel	Male	41	Higher education	Upper 25%						Allergies (e.g. pollen allergy)						1	1	N/A	No						Allergies (e.g. pollen allergy)	105	0.541237	0.194085
BSL_S_P032	BSL_S_H024	Basel	Male	29	Higher education	Upper 25%						Allergies (e.g. pollen allergy)						1	1	N/A	No						Hay fever	51	0.262887	0.0942699
BSL_S_P031	BSL_S_H023	Basel	Male	58	Higher education	Upper 25%											sun allergy	1	1	N/A	No						Chronic obstructuve pulmonary disease	2	0.0103093	0.00369686
BSL_S_P030	BSL_S_H023	Basel	Female	52	Higher education	Upper 25%	High blood pressure					Allergies (e.g. pollen allergy)					thyroid hypofunction	3	1	No	No						Diabetes	5	0.0257732	0.00924214
BSL_S_P029	BSL_S_H022	Basel	Male	39	Higher education	Upper 25%						Allergies (e.g. pollen allergy)	Hay fever					2	1	N/A	No						Influenza	5	0.0257732	0.00924214
BSL_S_P028	BSL_S_H021	Basel	Female	29	Higher education	Upper 25%												0	0	No	No						Other (please specify)	45	0.231959	0.0831793
BSL_S_P027	BSL_S_H021	Basel	Male	27	Higher education	Lower 25%						Allergies (e.g. pollen allergy)	Hay fever					2	1	N/A	No						Answered	194
BSL_S_P026	BSL_S_H043	Basel	Female	32	Higher education	Upper 25%												0	0	No	No						Skipped	347
BSL_S_P025	BSL_S_H020	Basel	Female	29	Higher education	Lower 25%		Low blood pressure				Allergies (e.g. pollen allergy)	Hay fever					3	1	No	No							541
BSL_S_P024	BSL_S_H019	Basel	Male	38	Completed secondary education	Average (25-75%)												0	0	N/A	No
BSL_S_P023	BSL_S_H018	Basel	Male	58	Higher education	Lower 25%						Allergies (e.g. pollen allergy)	Hay fever					2	1	N/A	No					Table S8. Pregnancy
BSL_S_P022	BSL_S_H018	Basel	Female	54	Higher education	Lower 25%						Allergies (e.g. pollen allergy)	Hay fever					2	1	No	No					Are you pregnant? (please select N/A if you are not a woman)
BSL_S_P021	BSL_S_H019	Basel	Female	30	Higher education	Lower 25%											thyroid hypofunction	1	1	No	No					Answer Choices	All cities	%	Ljubljana	%
BSL_S_P020	BSL_S_H017	Basel	Male	71	Higher education	Lower 25%											prostatic enlargement, sleeping disorder, osteoporosis, arthrosis	1	1	N/A	No					Yes	6	0.0136364	1	0.0138889
BSL_S_P019	BSL_S_H016	Basel	Male	33	Higher education	Average (25-75%)												0	0	N/A	No					No	248	0.563636	33	0.458333
BSL_S_P018	BSL_S_H015	Basel	Female	24	Higher education	Average (25-75%)						Allergies (e.g. pollen allergy)	Hay fever					2	1	No	No					N/A	186	0.422727	38	0.527778
BSL_S_P017	BSL_S_H014	Basel	Male	42	Higher education	Average (25-75%)												0	0	N/A	Yes (please specify type of cancer)	kidney cancer					440	1	72	1
BSL_S_P016	BSL_S_H013	Basel	Male	23	Higher education	Lower 25%					Asthma	Allergies (e.g. pollen allergy)	Hay fever					3	1	N/A	No
BSL_S_P015	BSL_S_H011	Basel	Female	32	Higher education	Lower 25%												0	0	No	No
BSL_S_P014	BSL_S_H012	Basel	Male	31	Higher education	Average (25-75%)												0	0	N/A	No
BSL_S_P013	BSL_S_H010	Basel	Male	29	Higher education	Upper 25%												0	0	N/A	No					Table S9. Do you have cancer?						Table S10. If yes, please specify type of cancer					sum
BSL_S_P012	BSL_S_H009	Basel	Male	31	Higher education	Upper 25%												0	0	N/A	No					Answer Choices	All cities	%	Ljubljana	%		DE COLÓN	CANCER DE COLÓN				2
BSL_S_P011	BSL_S_H008	Basel	Male	63	Higher education	Upper 25%	High blood pressure											1	1	N/A	No					Yes	18	0.0332717	0	0		MAMA	CANCER DE MAMA	MAMA	Ca Mama		4
BSL_S_P010	BSL_S_H006	Basel	Male	28	Higher education	Lower 25%					Asthma	Allergies (e.g. pollen allergy)	Hay fever					3	1	N/A	No					No	407	0.752311	70	0.958904		LINFOMA HODGKIN	LINFOMA				2
BSL_S_P009	BSL_S_H005	Basel	Female	46	Higher education	Upper 25%		Low blood pressure			Asthma	Allergies (e.g. pollen allergy)	Hay fever					4	1	No	No					skipped	116	0.214418	3	0.0410959		kidney cancer					1
BSL_S_P008	BSL_S_H005	Basel	Male	52	Completed secondary education	Upper 25%												0	0	N/A	No						541	1	73	1		VEJIGA					1
BSL_S_P007	BSL_S_H004	Basel	Male	36	Higher education	Lower 25%												0	0	N/A	No											PARÓTIDA Y MAMA	PARÓTIDA Y MAMA				2
BSL_S_P006	BSL_S_H004	Basel	Female	35	Higher education	Upper 25%												0	0	No	No											PRÓSTATA	PROSTATA				2
BSL_S_P005	BSL_S_H006	Basel	Female	23	Higher education	Lower 25%					Asthma	Allergies (e.g. pollen allergy)	Hay fever					3	1	No	No											PULMÓN					1
BSL_S_P004	BSL_S_H003	Basel	Female	33	Higher education	Upper 25%												0	0	No	No											ÚTERO					1
BSL_S_P003	BSL_S_H007	Basel	Female	32	Higher education	Average (25-75%)												0	0	No	No											Cancer - uterine fibroid cancer					1
BSL_S_P002	BSL_S_H002	Basel	Female	31	Higher education	Lower 25%						Allergies (e.g. pollen allergy)						1	1	No	No											N/A					1
BSL_S_P001	BSL_S_H001	Basel	Female	36	Higher education	Upper 25%												0	0	No	No																18
brn_w_p072@icarus2020.ovh	brn_w_h030@icarus2020.ovh	Brno	Female	36	Higher education	Average (25-75%)												0	0
brn_w_p071@icarus2020.ovh	brn_w_h029@icarus2020.ovh	Brno	Male	29	Higher education	Average (25-75%)												0	0		No
brn_w_p070@icarus2020.ovh	brn_w_h029@icarus2020.ovh	Brno	Female	31	Higher education	Average (25-75%)												0	0	No	No
brn_w_p069@icarus2020.ovh	brn_w_h028@icarus2020.ovh	Brno	Male	12	Primary education / Not completed secondary education	Lower 25%												0	0		No
brn_w_p068@icarus2020.ovh	brn_w_h028@icarus2020.ovh	Brno	Male	17	Primary education / Not completed secondary education	Lower 25%												0	0		No
brn_w_p067@icarus2020.ovh	brn_w_h028@icarus2020.ovh	Brno	Male	46	Higher education	Upper 25%												0	0		No
brn_w_p066@icarus2020.ovh	brn_w_h028@icarus2020.ovh	Brno	Female	44	Higher education	Upper 25%												0	0	No
brn_w_p065@icarus2020.ovh	brn_w_h027@icarus2020.ovh	Brno	Female	5		Lower 25%						Allergies (e.g. pollen allergy)						1	1	No	No
brn_w_p063@icarus2020.ovh	brn_w_h027@icarus2020.ovh	Brno	Female	31	Higher education	Lower 25%												0	0	No	No
brn_w_p064@icarus2020.ovh	brn_w_h027@icarus2020.ovh	Brno	Male	41	Higher education													0	0		No
brn_w_p062@icarus2020.ovh	brn_w_h026@icarus2020.ovh	Brno	Male	26	Completed secondary education	Average (25-75%)												0	0		No
brn_w_p061@icarus2020.ovh	brn_w_h026@icarus2020.ovh	Brno	Female	27	Higher education	Average (25-75%)												0	0	No	No
brn_w_p060@icarus2020.ovh	brn_w_h025@icarus2020.ovh	Brno	Female	34	Completed secondary education	Lower 25%												0	0	No	No
brn_w_p059@icarus2020.ovh	brn_w_h025@icarus2020.ovh	Brno	Male	28	Higher education	Average (25-75%)												0	0		No
brn_w_p057@icarus2020.ovh	brn_w_h024@icarus2020.ovh	Brno	Male	9	Primary education / Not completed secondary education	Lower 25%									Diabetes			1	1		No
brn_w_p056@icarus2020.ovh	brn_w_h024@icarus2020.ovh	Brno	Male	11														0	0		No
brn_w_p055@icarus2020.ovh	brn_w_h024@icarus2020.ovh	Brno	Female	40	Higher education	Average (25-75%)												0	0	No	No
brn_w_p054@icarus2020.ovh	brn_w_h024@icarus2020.ovh	Brno	Male	38	Higher education	Upper 25%												0	0		No
brn_w_p053@icarus2020.ovh	brn_w_h023@icarus2020.ovh	Brno	Female	27	Higher education	Lower 25%		Low blood pressure										1	1	No
brn_w_p052@icarus2020.ovh	brn_w_h023@icarus2020.ovh	Brno	Male	27	Higher education													0	0		No
brn_w_p047@icarus2020.ovh	brn_w_h020@icarus2020.ovh	Brno	Female	33	Higher education	Lower 25%		Low blood pressure										1	1	No
brn_w_p046@icarus2020.ovh	brn_w_h020@icarus2020.ovh	Brno	Male	34	Higher education	Average (25-75%)											Crohn's disease	1	1
brn_w_p045@icarus2020.ovh	brn_w_h019@icarus2020.ovh	Brno	Female	39	Higher education	Lower 25%		Low blood pressure										1	1	No	No
brn_w_p044@icarus2020.ovh	brn_w_h019@icarus2020.ovh	Brno	Male	43	Higher education	Upper 25%												0	0		No
brn_w_p043@icarus2020.ovh	brn_w_h018@icarus2020.ovh	Brno	Female	61	Higher education	Lower 25%												0	0	No	No
brn_w_p042@icarus2020.ovh	brn_w_h018@icarus2020.ovh	Brno	Male	60	Primary education / Not completed secondary education	Lower 25%												0	0		No
brn_w_p040@icarus2020.ovh	brn_w_h017@icarus2020.ovh	Brno	Male	27	Higher education		High blood pressure					Allergies (e.g. pollen allergy)	Hay fever				kidney disorder	4	1		No
brn_w_p041@icarus2020.ovh	brn_w_h017@icarus2020.ovh	Brno	Female	25	Higher education	Average (25-75%)												0	0	No	No
brn_w_p039@icarus2020.ovh	brn_w_h016@icarus2020.ovh	Brno	Male	42	Higher education	Upper 25%						Allergies (e.g. pollen allergy)	Hay fever					2	1		No
brn_w_p038@icarus2020.ovh	brn_w_h016@icarus2020.ovh	Brno	Female	42	Higher education	Upper 25%												0	0	No	No
brn_w_p035@icarus2020.ovh	brn_w_h015@icarus2020.ovh	Brno	Female	14	Primary education / Not completed secondary education	Lower 25%												0	0	No	No
brn_w_p034@icarus2020.ovh	brn_w_h015@icarus2020.ovh	Brno	Female	44	Higher education	Upper 25%												0	0	No	No
brn_w_p033@icarus2020.ovh	brn_w_h014@icarus2020.ovh	Brno	Male	34	Higher education	Upper 25%						Allergies (e.g. pollen allergy)						1	1
brn_w_p032@icarus2020.ovh	brn_w_h014@icarus2020.ovh	Brno	Female	37	Higher education	Upper 25%												0	0	N/A	No
brn_w_p031@icarus2020.ovh	brn_w_h013@icarus2020.ovh	Brno	Male	28	Higher education	Upper 25%						Allergies (e.g. pollen allergy)	Hay fever		Diabetes			3	1		No
brn_w_p030@icarus2020.ovh	brn_w_h013@icarus2020.ovh	Brno	Female	28	Higher education	Upper 25%		Low blood pressure										1	1	Yes	No
brn_w_p028@icarus2020.ovh	brn_w_h012@icarus2020.ovh	Brno	Female	55	Higher education	Upper 25%												0	0	No	No
brn_w_p029@icarus2020.ovh	brn_w_h012@icarus2020.ovh	Brno	Female	27	Higher education	Average (25-75%)						Allergies (e.g. pollen allergy)						1	1	No	No
brn_w_p027@icarus2020.ovh	brn_w_h011@icarus2020.ovh	Brno	Male	35	Higher education	Upper 25%												0	0
brn_w_p026@icarus2020.ovh	brn_w_h011@icarus2020.ovh	Brno	Male	63	Higher education	Upper 25%	High blood pressure										high cholesterol, thyroid	2	1		Yes (please specify type of cancer)	N/A
brn_w_p025@icarus2020.ovh	brn_w_h011@icarus2020.ovh	Brno	Male	35	Higher education	Lower 25%				Heart disease								1	1	No	No
brn_w_p024@icarus2020.ovh	brn_w_h011@icarus2020.ovh	Brno	Male	61	Higher education	Upper 25%												0	0	No	No
brn_w_p023@icarus2020.ovh	brn_w_h010@icarus2020.ovh	Brno	Male	22	Completed secondary education	Lower 25%												0	0		No
brn_w_p022@icarus2020.ovh	brn_w_h010@icarus2020.ovh	Brno	Female	19	Completed secondary education	Lower 25%												0	0	No	No
P088	H037	Brno	Female	32	Higher education	Upper 25%						Allergies (e.g. pollen allergy)						1	1	No	No
brn_w_p021@icarus2020.ovh	brn_w_h009@icarus2020.ovh	Brno	Female	14	Primary education / Not completed secondary education												rhinitis, cough	1	1	No	No
brn_w_p020@icarus2020.ovh	brn_w_h009@icarus2020.ovh	Brno	Male	17	Primary education / Not completed secondary education	Lower 25%												0	0
brn_w_p019@icarus2020.ovh	brn_w_h009@icarus2020.ovh	Brno	Male	24	Completed secondary education	Lower 25%												0	0		No
brn_w_p017@icarus2020.ovh	brn_w_h009@icarus2020.ovh	Brno	Female	51	Higher education	Lower 25%	High blood pressure											1	1	No	No
brn_w_p016@icarus2020.ovh	brn_w_h008@icarus2020.ovh	Brno	Female	41	Higher education	Average (25-75%)		Low blood pressure										1	1	No	No
brn_w_p014@icarus2020.ovh	brn_w_h007@icarus2020.ovh	Brno	Female	38	Completed secondary education	Upper 25%		Low blood pressure				Allergies (e.g. pollen allergy)	Hay fever					3	1	No	No
brn_w_p013@icarus2020.ovh	brn_w_h006@icarus2020.ovh	Brno	Male	42	Higher education	Upper 25%												0	0	N/A
brn_w_p012@icarus2020.ovh	brn_w_h006@icarus2020.ovh	Brno	Female	36	Higher education	Average (25-75%)						Allergies (e.g. pollen allergy)	Hay fever					2	1	No	No
brn_w_p011@icarus2020.ovh	brn_w_h005@icarus2020.ovh	Brno	Male	33	Higher education	Upper 25%	High blood pressure					Allergies (e.g. pollen allergy)	Hay fever				atopic eczema	4	1		No
brn_w_p010@icarus2020.ovh	brn_w_h005@icarus2020.ovh	Brno	Female	33	Higher education	Average (25-75%)		Low blood pressure										1	1	No	No
brn_w_p009@icarus2020.ovh	brn_w_h004@icarus2020.ovh	Brno	Female	41	Higher education	Average (25-75%)					Asthma	Allergies (e.g. pollen allergy)	Hay fever					3	1	No
brn_w_p008@icarus2020.ovh	brn_w_h004@icarus2020.ovh	Brno	Male	45	Completed secondary education	Upper 25%	High blood pressure											1	1
brn_w_p007@icarus2020.ovh	brn_w_h004@icarus2020.ovh	Brno	Female	8	Primary education / Not completed secondary education													0	0	No
brn_w_p006@icarus2020.ovh	brn_w_h003@icarus2020.ovh	Brno	Female	30	Higher education	Lower 25%					Asthma	Allergies (e.g. pollen allergy)	Hay fever					3	1	No	No
brn_w_p005@icarus2020.ovh	brn_w_h003@icarus2020.ovh	Brno	Male	31	Higher education	Upper 25%												0	0		No
brn_w_p004@icarus2020.ovh	brn_w_h002@icarus2020.ovh	Brno	Female	56	Higher education	Average (25-75%)		Low blood pressure									back pain	2	1	No	No
brn_w_p003@icarus2020.ovh	brn_w_h002@icarus2020.ovh	Brno	Female	27	Higher education	Lower 25%		Low blood pressure				Allergies (e.g. pollen allergy)	Hay fever				anemia	4	1	No	No
brn_w_p002@icarus2020.ovh	brn_w_h001@icarus2020.ovh	Brno	Male	30	Higher education	Average (25-75%)												0	0	No	No
brn_w_p001@icarus2020.ovh	brn_w_h001@icarus2020.ovh	Brno	Female	27	Higher education	Upper 25%												0	0	Yes
brn_w_p050@icarus2020.ovh	brn_w_h022@icarus2020.ovh	Brno	Male	29	Higher education	Lower 25%						Allergies (e.g. pollen allergy)						1	1	N/A	No
brn_w_p051@icarus2020.ovh	brn_w_h022@icarus2020.ovh	Brno	Female	26	Higher education	Lower 25%									Diabetes			1	1	No	No
456	456	Brno	Male	45	Higher education	Upper 25%												0	0
LJU_W_P056	LJU_W_H036	Ljubljana	Female	20	Primary education / Not completed secondary education	Lower 25%												0	0	No	No
LJU_W_P057	LJU_W_H036	Ljubljana	Male	20	Primary education / Not completed secondary education	Lower 25%												0	0	N/A	No
LJU_W_P058	LJU_W_H037	Ljubljana	Male	35	Higher education	Average (25-75%)							Hay fever					1	1	N/A	No
LJU_W_P060	LJU_W_H038	Ljubljana	Male	12														0	0	N/A	No
LJU_W_P059	LJU_W_H038	Ljubljana	Male	40	Higher education	Average (25-75%)						Allergies (e.g. pollen allergy)						1	1	N/A	No
LJU_W_P061	LJU_W_H038	Ljubljana	Female	65	Completed secondary education	Lower 25%	High blood pressure				Asthma							2	1	No	No
LJU_W_P063	LJU_W_H039	Ljubljana	Female	13	Primary education / Not completed secondary education													0	0	No	No
LJU_W_P062	LJU_W_H039	Ljubljana	Male	43	Higher education	Upper 25%												0	0	N/A	No
LJU_W_P064	LJU_W_H039	Ljubljana	Female	46	Higher education	Upper 25%												0	0	No	No
LJU_W_P066	LJU_W_H040	Ljubljana	Male	17	Primary education / Not completed secondary education						Asthma	Allergies (e.g. pollen allergy)	Hay fever					3	1	N/A	No
LJU_W_P065	LJU_W_H040	Ljubljana	Female	47	Higher education	Average (25-75%)												0	0	No	No
LJU_W_P068	LJU_W_H041	Ljubljana	Female	42	Higher education	Average (25-75%)												0	0	No	No
LJU_W_P067	LJU_W_H041	Ljubljana	Male	44	Higher education	Average (25-75%)												0	0	N/A	No
LJU_W_P070	LJU_W_H042	Ljubljana	Female	41	Higher education	Upper 25%												0	0	No	No
LJU_W_P071	LJU_W_H043	Ljubljana	Female	65	Completed secondary education	Average (25-75%)	High blood pressure											1	1	No	No
LJU_W_P073	LJU_W_H044	Ljubljana	Male	18	Primary education / Not completed secondary education													0	0
LJU_W_P072	LJU_W_H044	Ljubljana	Female	52	Higher education	Average (25-75%)												0	0	No	No
LJU_W_P075	LJU_W_H045	Ljubljana	Male	14	Primary education / Not completed secondary education													0	0	N/A	No
LJU_W_P074	LJU_W_H045	Ljubljana	Female	53	Higher education	Upper 25%												0	0	No	No
LJU_W_P077	LJU_W_H046	Ljubljana	Female	47	Higher education	Average (25-75%)											Obsessive compulsive disorder	1	1	No	No
LJU_W_P076	LJU_W_H046	Ljubljana	Male	50	Higher education	Upper 25%							Hay fever					1	1	N/A	No
LJU_W_P026	LJU_W_H032	Ljubljana	Female	25	Higher education	Average (25-75%)												0	0	No	No
LJU_W_P054	LJU_W_H035	Ljubljana	Female	48	Higher education	Average (25-75%)						Allergies (e.g. pollen allergy)	Hay fever					2	1	No	No
LJU_W_P079	LJU_W_H047	Ljubljana	Female	32	Higher education	Upper 25%				Heart disease	Asthma	Allergies (e.g. pollen allergy)						3	1	No	No
LJU_W_P078	LJU_W_H047	Ljubljana	Male	34	Higher education	Upper 25%												0	0	N/A	No
LJU_W_P080	LJU_W_H048	Ljubljana	Male	47	Higher education	Average (25-75%)												0	0	N/A	No
LJU_W_P081	LJU_W_H048	Ljubljana	Female	46	Higher education	Average (25-75%)						Allergies (e.g. pollen allergy)						1	1	No	No
LJU_W_P082	LJU_W_H049	Ljubljana	Male	41	Higher education	Average (25-75%)												0	0	N/A	No
LJU_W_P051	LJU_W_H033	Ljubljana	Male	43	Higher education	Average (25-75%)					Asthma	Allergies (e.g. pollen allergy)						2	1	N/A	No
LJU_W_P083	LJU_W_H050	Ljubljana	Male	57	Higher education	Upper 25%												0	0	N/A	No
LJU_W_P085	LJU_W_H051	Ljubljana	Male	63	Higher education	Average (25-75%)												0	0	N/A	No
LJU_W_P084	LJU_W_H051	Ljubljana	Female	55	Completed secondary education	Average (25-75%)												0	0	No	No
LJU_W_P086	LJU_W_H052	Ljubljana	Female	36	Higher education	Average (25-75%)												0	0	No	No
LJU_W_P049	LJU_W_H031	Ljubljana	Male	31	Higher education	Average (25-75%)												0	0	N/A	No
LJU_W_P048	LJU_W_H030	Ljubljana	Male	59	Higher education	Average (25-75%)					Asthma	Allergies (e.g. pollen allergy)	Hay fever					3	1	N/A	No
LJU_W_P045	LJU_W_H029	Ljubljana	Female	52	Higher education	Average (25-75%)												0	0	No	No
LJU_W_P046	LJU_W_H029	Ljubljana	Male	53	Higher education	Average (25-75%)												0	0	N/A	No
LJU_W_P047	LJU_W_H029	Ljubljana	Male	20	Completed secondary education													0	0	N/A	No
LJU_W_P044	LJU_W_H028	Ljubljana	Female	60	Higher education	Average (25-75%)												0	0	No	No
LJU_W_P042	LJU_W_H027	Ljubljana	Male	29	Higher education	Average (25-75%)						Allergies (e.g. pollen allergy)						1	1	N/A	No
LJU_W_P040	LJU_W_H025	Ljubljana	Male	64	Higher education	Average (25-75%)	High blood pressure											1	1	N/A	No
LJU_W_P038	LJU_W_H024	Ljubljana	Male	40	Higher education	Average (25-75%)						Allergies (e.g. pollen allergy)	Hay fever					2	1	N/A	No
LJU_W_P039	LJU_W_H024	Ljubljana	Male	15		Average (25-75%)												0	0	N/A	No
LJU_W_P036	LJU_W_H023	Ljubljana	Male	37	Higher education	Upper 25%					Asthma	Allergies (e.g. pollen allergy)	Hay fever					3	1	N/A	No
LJU_W_P036	LJU_W_H023	Ljubljana	Female	6														0	0	No	No
LJU_W_P035	LJU_W_H023	Ljubljana	Male	9														0	0	N/A	No
LJU_W_P032	LJU_W_H021	Ljubljana	Male	47	Completed secondary education	Average (25-75%)												0	0	N/A	No
LJU_W_P031	LJU_W_H020	Ljubljana	Female	49	Higher education	Upper 25%		Low blood pressure										1	1	No	No
LJU_W_P029	LJU_W_H019	Ljubljana	Male	27	Higher education	Average (25-75%)												0	0	N/A	No
LJU_W_P030	LJU_W_H019	Ljubljana	Female	25	Higher education	Average (25-75%)						Allergies (e.g. pollen allergy)						1	1	Yes	No
LJU_W_P027	LJU_W_H018	Ljubljana	Female	40	Higher education	Lower 25%												0	0	N/A	No
LJU_W_P025	LJU_W_H016	Ljubljana	Female	69	Completed secondary education	Lower 25%	High blood pressure							Chronic obstructuve pulmonary disease				2	1	No	No
LJU_W_P023	LJU_W_H015	Ljubljana	Female	39	Higher education	Average (25-75%)												0	0	No	No
LJU_W_P022	LJU_W_H015	Ljubljana	Male	43	Higher education	Average (25-75%)					Asthma	Allergies (e.g. pollen allergy)						2	1	No	No
LJU_W_P019	LJU_W_H014	Ljubljana	Female	49	Higher education	Average (25-75%)												0	0	No	No
LJU_W_P021	LJU_W_H014	Ljubljana	Male	49	Higher education	Average (25-75%)												0	0	N/A	No
LJU_W_P020	LJU_W_H014	Ljubljana	Male	18	Primary education / Not completed secondary education													0	0	N/A
LJU_W_P018	LJU_W_H013	Ljubljana	Male	74	Higher education	Upper 25%		Low blood pressure		Heart disease								2	1	N/A	No
LJU_W_P016	LJU_W_H012	Ljubljana	Female	32	Higher education	Upper 25%												0	0	No	No
LJU_W_P015	LJU_W_H011	Ljubljana	Male	47	Higher education	Average (25-75%)											Hyper / hypo thyrosis	1	1	N/A	No
LJU_W_P014	LJU_W_H010	Ljubljana	Female	57	Higher education	Average (25-75%)												0	0	No	No
LJU_W_P013	LJU_W_H009	Ljubljana	Female	37	Higher education	Average (25-75%)												0	0	No	No
LJU_W_P028	LJU_W_H008	Ljubljana	Male	70	Higher education		High blood pressure											1	1	N/A	No
LJU_W_P012	LJU_W_H008	Ljubljana	Female	63	Higher education													0	0	No	No
LJU_W_P010	LJU_W_H007	Ljubljana	Male	35	Completed secondary education	Lower 25%												0	0	N/A	No
LJU_W_P008	LJU_W_H006	Ljubljana	Female	37	Higher education	Upper 25%						Allergies (e.g. pollen allergy)	Hay fever					2	1	No	No
LJU_W_P006	LJU_W_H005	Ljubljana	Male	35	Completed secondary education	Lower 25%												0	0	N/A
LJU_W_P007	LJU_W_H004	Ljubljana	Male	39	Higher education	Upper 25%												0	0	N/A	No
P005	H004	Ljubljana	Female	40	Higher education	Upper 25%												0	0	No	No
P004	H003	Ljubljana	Female	59	Completed secondary education	Average (25-75%)						Allergies (e.g. pollen allergy)	Hay fever					2	1	No	No
P003	H002	Ljubljana	Male	62	Higher education	Average (25-75%)					Asthma	Allergies (e.g. pollen allergy)						2	1	N/A	No
P002	H001	Ljubljana	Female	11	Primary education / Not completed secondary education													0	0	No	No
P001	H001	Ljubljana	Male	36	Higher education	Upper 25%												0	0	N/A	No
105	32	Madrid	Female	68	Completed secondary education	Average (25-75%)		Low blood pressure										1	1	No	Yes (please specify type of cancer)	CANCER DE MAMA
70	54	Madrid	Male	58	Higher education			Low blood pressure										1	1	N/A	No
58	44	Madrid	Male	59	Higher education	Average (25-75%)												0	0	N/A	No
79	39	Madrid	Male	37	Completed secondary education	Upper 25%						Allergies (e.g. pollen allergy)						1	1	N/A	No
99	34	Madrid	Female	43	Higher education	Average (25-75%)												0	0	No	No
57	34	Madrid	Male	43	Higher education	Average (25-75%)				Heart disease								1	1	N/A	No
60	45	Madrid	Male	54	Completed secondary education	Average (25-75%)												0	0	N/A	No
112	10	Madrid	Female	68	Completed secondary education		High blood pressure											1	1	No	Yes (please specify type of cancer)	MAMA
110	15	Madrid	Female	77	Higher education	Average (25-75%)	High blood pressure											1	1	No	No
89	45	Madrid	Female	49	Higher education	Average (25-75%)		Low blood pressure									OSTEOPOROSIS	2	1	No	No
85	40	Madrid	Female	66	Higher education													0	0	No	No
43	28	Madrid	Male	72	Higher education	Upper 25%											PROBLEMAS CERVICALES	1	1	N/A	Yes (please specify type of cancer)	CANCER DE COLÓN
97	38	Madrid	Male	77	Higher education		High blood pressure								Diabetes			2	1	N/A	No
61	38	Madrid	Female	76	Higher education		High blood pressure										BRONQUITIS CRÓNICA	2	1	No	No
63	47	Madrid	Male	25	Higher education													0	0	N/A	No
101	52	Madrid	Female	65	Higher education	Average (25-75%)						Allergies (e.g. pollen allergy)	Hay fever					2	1	No	No
87	50	Madrid	Female	53	Completed secondary education	Upper 25%				Heart disease								1	1	No	No
71	50	Madrid	Male	18	Completed secondary education							Allergies (e.g. pollen allergy)						1	1	N/A	No
82	27	Madrid	Male	20	Completed secondary education													0	0	N/A	No
75	27	Madrid	Male	16	Primary education / Not completed secondary education													0	0	N/A	No
83	27	Madrid	Male	62	Completed secondary education	Average (25-75%)												0	0	N/A	No
72	27	Madrid	Female	58	Completed secondary education	Average (25-75%)												0	0	No	No
111	23	Madrid	Female	14	Primary education / Not completed secondary education							Allergies (e.g. pollen allergy)						1	1	No	No
64	23	Madrid	Male	57	Higher education	Upper 25%												0	0	N/A	Yes (please specify type of cancer)	VEJIGA
107	33	Madrid	Female	20	Completed secondary education													0	0	No	No
93	51	Madrid	Male	16	Completed secondary education													0	0	N/A	No
81	51	Madrid	Female	54	Higher education	Upper 25%						Allergies (e.g. pollen allergy)						1	1	No	No
69	41	Madrid	Male	55	Completed secondary education	Lower 25%												0	0	N/A	No
62	41	Madrid	Female	50	Higher education	Average (25-75%)						Allergies (e.g. pollen allergy)						1	1	No	No
106	36	Madrid	Male	14	Primary education / Not completed secondary education							Allergies (e.g. pollen allergy)						1	1	N/A	No
80	36	Madrid	Female	53	Higher education	Average (25-75%)	High blood pressure											1	1	No	Yes (please specify type of cancer)	LINFOMA HODGKIN
68	55	Madrid	Male	33	Completed secondary education	Lower 25%												0	0	N/A	No
65	37	Madrid	Female	64	Higher education	Upper 25%												0	0	No	No
109	37	Madrid	Male	78	Higher education	Lower 25%	High blood pressure								Diabetes			2	1	N/A	No
51	49	Madrid	Female	71	Completed secondary education	Upper 25%					Asthma							1	1	No	Yes (please specify type of cancer)	PARÓTIDA Y MAMA
7	49	Madrid	Male	71	Completed secondary education	Upper 25%						Allergies (e.g. pollen allergy)						1	1	N/A	No
86	33	Madrid	Female	52	Completed secondary education	Average (25-75%)												0	0	No	No
103	46	Madrid	Male	47	Higher education													0	0	N/A	No
98	46	Madrid	Female	49	Higher education	Upper 25%												0	0	No	No
94	42	Madrid	Male	36	Higher education	Average (25-75%)												0	0	N/A	No
88	42	Madrid	Female	31	Higher education	Lower 25%												0	0	No	No
76	43	Madrid	Male	55	Higher education	Average (25-75%)						Allergies (e.g. pollen allergy)	Hay fever					2	1	N/A	No
108	29	Madrid	Female	48	Completed secondary education	Average (25-75%)												0	0	No	No
96	29	Madrid	Male	17	Completed secondary education							Allergies (e.g. pollen allergy)						1	1	N/A	No
77	44	Madrid	Male	59	Higher education	Average (25-75%)												0	0	N/A	No
77	44	Madrid	Female	21	Higher education													0	0	No	No
78	44	Madrid	Female	52	Higher education	Upper 25%												0	0	No	No
59	44	Madrid	Male	23	Higher education	Lower 25%												0	0	N/A	No
100	35	Madrid	Female	43	Higher education	Upper 25%						Allergies (e.g. pollen allergy)					ULCERA INTESTINAL	2	1	No	No
67	35	Madrid	Male	13	Primary education / Not completed secondary education													0	0	N/A	No
73	53	Madrid	Male	39	Higher education	Average (25-75%)						Allergies (e.g. pollen allergy)						1	1	N/A	No
5	14	Madrid	Female	44	Completed secondary education	Average (25-75%)												0	0	No	No
41	14	Madrid	Male	50	Higher education	Average (25-75%)	High blood pressure			Heart disease	Asthma	Allergies (e.g. pollen allergy)	Hay fever					5	1	N/A	No
66	26	Madrid	Male	61	Higher education							Allergies (e.g. pollen allergy)						1	1	N/A	No
74	26	Madrid	Female	54	Higher education												CELIAQUÍA	1	1	No	No
95	48	Madrid	Male	62	Higher education	Upper 25%	High blood pressure											1	1	N/A	No
91	48	Madrid	Female	67	Completed secondary education	Upper 25%												0	0	No	Yes (please specify type of cancer)	MAMA
24	4	Madrid	Female	49	Primary education / Not completed secondary education													0	0	No	No
20	4	Madrid	Male	49	Higher education	Upper 25%						Allergies (e.g. pollen allergy)						1	1	N/A	No
102	25	Madrid	Female	31	Higher education													0	0	No	No
84	25	Madrid	Male	35	Higher education	Upper 25%						Allergies (e.g. pollen allergy)	Hay fever			Influenza		3	1	N/A	No
87	43	Madrid	Female	53	Completed secondary education	Upper 25%												0	0	No	No
71	43	Madrid	Male	18	Completed secondary education							Allergies (e.g. pollen allergy)						1	1	N/A	No
104	30	Madrid	Male	71	Higher education	Lower 25%							Hay fever					1	1	N/A	Yes (please specify type of cancer)	PRÓSTATA
92	30	Madrid	Female	71	Higher education							Allergies (e.g. pollen allergy)	Hay fever					2	1	No	No
56	31	Madrid	Female	23	Completed secondary education			Low blood pressure										1	1	No	No
90	31	Madrid	Female	51	Higher education	Lower 25%												0	0	No	No
27	3	Madrid	Female	53	Higher education	Upper 25%												0	0	No	No
26	3	Madrid	Male	61	Higher education	Upper 25%						Allergies (e.g. pollen allergy)					HIPERLIPEMIA	2	1	N/A	No
19	12	Madrid	Female	36	Higher education	Average (25-75%)												0	0	No
16	12	Madrid	Male	42	Completed secondary education	Average (25-75%)					Asthma	Allergies (e.g. pollen allergy)						2	1	N/A	No
30	19	Madrid	Male	56	Higher education	Average (25-75%)												0	0	N/A	No
31	19	Madrid	Female	17	Primary education / Not completed secondary education													0	0	No	No
29	19	Madrid	Female	59	Higher education	Lower 25%												0	0	No	No
28	1	Madrid	Female	33	Higher education	Average (25-75%)												0	0	No	No
54	1	Madrid	Male	34	Higher education	Average (25-75%)												0	0	N/A	No
13	21	Madrid	Male	47	Primary education / Not completed secondary education	Average (25-75%)												0	0	N/A	No
17	21	Madrid	Female	47	Completed secondary education	Average (25-75%)												0	0	No	No
14	21	Madrid	Male	14	Primary education / Not completed secondary education													0	0	N/A	No
6	16	Madrid	Male	50	Completed secondary education												HIPOTIROIDISMO	1	1	N/A	No
8	16	Madrid	Male	18	Completed secondary education													0	0	N/A	No
22	8	Madrid	Female	29	Higher education	Average (25-75%)		Low blood pressure				Allergies (e.g. pollen allergy)						2	1	No	No
42	8	Madrid	Male	24	Primary education / Not completed secondary education	Upper 25%												0	0	N/A	No
23	8	Madrid	Male	71	Higher education	Upper 25%												0	0	N/A	Yes (please specify type of cancer)	PULMÓN
21	8	Madrid	Female	60	Higher education	Upper 25%		Low blood pressure										1	1	No	No
32	18	Madrid	Female	64	Higher education	Average (25-75%)												0	0	No	No
38	18	Madrid	Male	63	Higher education	Upper 25%												0	0	N/A	No
64	13	Madrid	Female	64	Completed secondary education	Average (25-75%)												0	0	No	Yes (please specify type of cancer)	DE COLÓN
1	13	Madrid	Male	67	Completed secondary education	Average (25-75%)			Heart attack									1	1	N/A	No
48	20	Madrid	Female	18	Completed secondary education													0	0	No	No
4	20	Madrid	Male	23	Higher education	Lower 25%												0	0	N/A	No
55	20	Madrid	Male	55	Higher education	Upper 25%												0	0	N/A	No
48	20	Madrid	Female	18	Completed secondary education													0	0
37	17	Madrid	Female	62	Higher education	Average (25-75%)												0	0	No	No
9	17	Madrid	Male	30	Higher education													0	0	N/A	No
12	17	Madrid	Male	59	Completed secondary education	Average (25-75%)												0	0	N/A	No
55	20	Madrid	Female	53	Completed secondary education	Average (25-75%)											CARDIOVASCULAR	1	1	No	Yes (please specify type of cancer)	ÚTERO
51	15	Madrid	Female	71	Completed secondary education	Upper 25%					Asthma							1	1	No	Yes (please specify type of cancer)	PARÓTIDA Y MAMA
49	6	Madrid	Female	59	Completed secondary education	Lower 25%												0	0	No	No
34	6	Madrid	Female	24	Higher education	Lower 25%												0	0	No	No
45	6	Madrid	Male	25	Higher education	Lower 25%												0	0	N/A	No
34	6	Madrid	Female	24	Higher education	Lower 25%												0	0	No	No
51	15	Madrid	Female	71	Completed secondary education	Upper 25%												0	0
40	2	Madrid	Female	52	Primary education / Not completed secondary education	Average (25-75%)												0	0	No	No
52	2	Madrid	Female	28	Higher education	Lower 25%					Asthma	Allergies (e.g. pollen allergy)						2	1	No	No
53	2	Madrid	Female	35	Completed secondary education	Lower 25%					Asthma	Allergies (e.g. pollen allergy)						2	1	No	No
47	5	Madrid	Female	62	Completed secondary education	Average (25-75%)		Low blood pressure			Asthma	Allergies (e.g. pollen allergy)	Hay fever					4	1	No	No
50	5	Madrid	Female	39	Primary education / Not completed secondary education	Lower 25%		Low blood pressure			Asthma	Allergies (e.g. pollen allergy)	Hay fever					4	1	No	No
7	15	Madrid	Male	71	Completed secondary education	Upper 25%						Allergies (e.g. pollen allergy)						1	1	N/A	No
25	11	Madrid	Male	14	Primary education / Not completed secondary education													0	0	No	No
11	11	Madrid	Female	54	Primary education / Not completed secondary education		High blood pressure				Asthma	Allergies (e.g. pollen allergy)	Hay fever					4	1	No	No
33	22	Madrid	Female	18	Completed secondary education													0	0	No	No
3	22	Madrid	Male	57	Higher education	Upper 25%												0	0	N/A	Yes (please specify type of cancer)	PROSTATA
44	22	Madrid	Female	48	Higher education	Upper 25%						Allergies (e.g. pollen allergy)	Hay fever					2	1	No	No
10	9	Madrid	Female	33	Completed secondary education	Lower 25%											COLITIS ULCEROSA	1	1	No	Yes (please specify type of cancer)	LINFOMA
18	9	Madrid	Female	35	Primary education / Not completed secondary education	Lower 25%												0	0	No	No
46	24	Madrid	Female	61	Completed secondary education	Lower 25%					Asthma	Allergies (e.g. pollen allergy)	Hay fever					3	1	N/A	Yes (please specify type of cancer)	Ca Mama
35	24	Madrid	Male	35	Primary education / Not completed secondary education	Lower 25%					Asthma	Allergies (e.g. pollen allergy)	Hay fever					3	1	N/A	No
39	7	Madrid	Female	63	Primary education / Not completed secondary education	Lower 25%												0	0	No	No
36	7	Madrid	Male	62	Primary education / Not completed secondary education	Lower 25%											HYPERCOLESTEROLEMIA, PROSTATE	1	1	N/A	No
12	52	Madrid	Female															0	0
200	200	Madrid	Male	16	Higher education	Upper 25%												0	0
200	200	Madrid	Male	18	Primary education / Not completed secondary education	Upper 25%	High blood pressure											1	1	N/A	No
522255522	555555	Madrid	Female		Completed secondary education	Average (25-75%)												0	0
MIL_W_P065	MIL_W_H026	Milan	Female	60	Completed secondary education	Average (25-75%)												0	0	No
MIL_W_P006	MIL_W_H002	Milan	Female	56	Higher education													0	0	No
MIL_W_P008	MIL_W_H002	Milan	Female	20	Higher education													0	0
MIL_W_P029	MIL_W_H011	Milan	Female	44	Completed secondary education													0	0	No
MIL_W_P089	MIL_W_H038	Milan	Female	51	Higher education	Lower 25%						Allergies (e.g. pollen allergy)		Chronic obstructuve pulmonary disease				2	1	No
MIL_W_P088	MIL_W_H038	Milan	Female	43	Higher education	Average (25-75%)												0	0	No	No
MIL_W_P087	MIL_W_H037	Milan	Female	48	Higher education	Average (25-75%)												0	0	No
MIL_W_P086	MIL_W_H036	Milan	Female	47	Higher education	Average (25-75%)												0	0	No	No
MIL_W_P085	MIL_W_H035	Milan	Female	62	Completed secondary education	Average (25-75%)												0	0	N/A
MIL_W_P084	MIL_W_H035	Milan	Male	59	Completed secondary education	Average (25-75%)	High blood pressure											1	1
MIL_W_P083	MIL_W_H034	Milan	Female	15	Primary education / Not completed secondary education													0	0
MIL_W_P082	MIL_W_H034	Milan	Male	20	Completed secondary education													0	0
MIL_W_P081	MIL_W_H034	Milan	Female	55	Completed secondary education	Lower 25%				Heart disease								1	1	No	No
MIL_W_P080	MIL_W_H034	Milan	Male	59	Higher education	Lower 25%	High blood pressure											1	1
MIL_W_P079	MIL_W_H033	Milan	Male	8								Allergies (e.g. pollen allergy)						1	1	N/A
MIL_W_P078	MIL_W_H033	Milan	Female	43	Higher education	Average (25-75%)												0	0
MIL_W_P077	MIL_W_H033	Milan	Male	49	Higher education	Average (25-75%)						Allergies (e.g. pollen allergy)						1	1	N/A
MIL_W_P076	MIL_W_H032	Milan	Female	37	Higher education	Average (25-75%)												0	0	Yes
MIL_W_P075	MIL_W_H032	Milan	Male	39	Higher education	Average (25-75%)												0	0
MIL_W_P074	MIL_W_H031	Milan	Female	82	Completed secondary education	Average (25-75%)												0	0
MIL_W_P073	MIL_W_H031	Milan	Male	82	Higher education	Average (25-75%)	High blood pressure										Prostrate	2	1
MIL_W_P072	MIL_W_H030	Milan	Male	40	Higher education	Average (25-75%)						Allergies (e.g. pollen allergy)						1	1
MIL_W_P071	MIL_W_H030	Milan	Female	40	Higher education	Average (25-75%)												0	0	Yes
MIL_W_P070	MIL_W_H029	Milan	Female	55	Completed secondary education	Average (25-75%)												0	0
MIL_W_P069	MIL_W_H029	Milan	Male	58	Completed secondary education	Average (25-75%)												0	0
MIL_W_P068	MIL_W_H028	Milan	Female	40	Higher education													0	0
MIL_W_P067	MIL_W_H028	Milan	Male	50	Higher education													0	0
MIL_W_P064	MIL_W_H025	Milan	Male	4														0	0
MIL_W_P063	MIL_W_H025	Milan	Male	7	Primary education / Not completed secondary education													0	0
MIL_W_P062	MIL_W_H025	Milan	Female	39	Higher education	Average (25-75%)												0	0
MIL_W_P061	MIL_W_H025	Milan	Male	43	Higher education	Average (25-75%)												0	0
MIL_W_P060	MIL_W_H024	Milan	Female	56	Higher education	Average (25-75%)											RAFFREDDORE, TOSSE SECCA	1	1	No
MIL_W_P059	MIL_W_H024	Milan	Male	56	Higher education	Average (25-75%)												0	0
MIL_W_P058	MIL_W_H023	Milan	Female	63	Completed secondary education	Lower 25%												0	0
MIL_W_P057	MIL_W_H023	Milan	Male	71	Higher education	Lower 25%												0	0
MIL_W_P056	MIL_W_H022	Milan	Female	8	Primary education / Not completed secondary education													0	0	No
MIL_W_P055	MIL_W_H022	Milan	Female	39	Higher education													0	0
MIL_W_P054	MIL_W_H022	Milan	Male	43	Higher education	Average (25-75%)												0	0	N/A
MIL_W_P053	MIL_W_H021	Milan	Female	9	Primary education / Not completed secondary education													0	0
MIL_W_P052	MIL_W_H021	Milan	Male	10	Primary education / Not completed secondary education													0	0
MIL_W_P051	MIL_W_H021	Milan	Male	13	Primary education / Not completed secondary education												Celiac disease	1	1
MIL_W_P050	MIL_W_H021	Milan	Female	37	Completed secondary education	Lower 25%											Allergic to Metal Nikel	1	1	No
MIL_W_P049	MIL_W_H021	Milan	Male	39	Higher education	Lower 25%												0	0
MIL_W_P048	MIL_W_H020	Milan	Male	25	Higher education	Lower 25%						Allergies (e.g. pollen allergy)						1	1
MIL_W_P047	MIL_W_H019	Milan	Female	41	Higher education	Average (25-75%)											GASTRITE CRONICA	1	1		No
MIL_W_P044	MIL_W_H018	Milan	Female	66	Higher education												IPERCOLESTEROLEMIA	1	1	No
MIL_W_P046	MIL_W_H017	Milan	Female	11	Primary education / Not completed secondary education													0	0	N/A
MIL_W_P045	MIL_W_H017	Milan	Female	15	Primary education / Not completed secondary education													0	0	No
MIL_W_P043	MIL_W_H017	Milan	Female	16	Primary education / Not completed secondary education													0	0	No
MIL_W_P042	MIL_W_H017	Milan	Male	45	Higher education	Upper 25%	High blood pressure				Asthma	Allergies (e.g. pollen allergy)						3	1
MIL_W_P041	MIL_W_H016	Milan	Female	16	Completed secondary education													0	0	No
MIL_W_P040	MIL_W_H016	Milan	Male	19	Completed secondary education													0	0
MIL_W_P039	MIL_W_H016	Milan	Female	50	Completed secondary education	Average (25-75%)												0	0	No
MIL_W_P038	MIL_W_H016	Milan	Male	52	Completed secondary education	Average (25-75%)											Hernia and prostrate	1	1	N/A	No
MIL_W_P037	MIL_W_H015	Milan	Male	34	Completed secondary education	Average (25-75%)												0	0
MIL_W_P036	MIL_W_H015	Milan	Female	32	Higher education	Average (25-75%)												0	0	No	No
MIL_W_P035	MIL_W_H014	Milan	Female	62	Completed secondary education	Average (25-75%)						Allergies (e.g. pollen allergy)					Sometime of food allergy. Using "EOTIROX" everyday	2	1	No	No
MIL_W_P034	MIL_W_H013	Milan	Female	44	Completed secondary education	Average (25-75%)												0	0	No	No
MIL_W_P033	MIL_W_H012	Milan	Female	53	Higher education	Average (25-75%)		Low blood pressure				Allergies (e.g. pollen allergy)						2	1	No	Yes (please specify type of cancer)	Cancer - uterine fibroid cancer
MIL_W_P032	MIL_W_H011	Milan	Male	6	Primary education / Not completed secondary education													0	0	No	No
MIL_W_P031	MIL_W_H011	Milan	Female	7	Primary education / Not completed secondary education													0	0	No	No
MIL_W_P030	MIL_W_H011	Milan	Female	11	Primary education / Not completed secondary education													0	0	No	No
MIL_W_P028	MIL_W_H011	Milan	Male	43	Completed secondary education	Average (25-75%)						Allergies (e.g. pollen allergy)						1	1	N/A	No
MIL_W_P026	MIL_W_H010	Milan	Female	44	Higher education	Average (25-75%)												0	0	No	No
MIL_W_P025	MIL_W_H009	Milan	Female	19	Completed secondary education													0	0	No	No
MIL_W_P024	MIL_W_H009	Milan	Male	21	Completed secondary education													0	0	No	No
MIL_W_P023	MIL_W_H009	Milan	Female	46	Completed secondary education	Average (25-75%)												0	0	No	No
MIL_W_P027	MIL_W_H008	Milan	Male	58	Higher education	Upper 25%						Allergies (e.g. pollen allergy)					GLAUCOMA	2	1	N/A	No
MIL_W_P022	MIL_W_H008	Milan	Female	17	Completed secondary education							Allergies (e.g. pollen allergy)				Influenza		2	1	No	No
MIL_W_P021	MIL_W_H008	Milan	Male	22	Completed secondary education							Allergies (e.g. pollen allergy)						1	1	N/A	No
MIL_W_P020	MIL_W_H008	Milan	Female	56	Completed secondary education												TIROIDITE DI HASHIMOTO	1	1	No	No
MIL_W_P019	MIL_W_H007	Milan	Female	50	Higher education	Average (25-75%)												0	0	No	No
MIL_W_P018	MIL_W_H007	Milan	Male	50	Higher education	Average (25-75%)											ORTICARCA	1	1	N/A	No
MIL_W_P016	MIL_W_H006	Milan	Male	26	Higher education	Average (25-75%)												0	0	N/A	No
MIL_W_P015	MIL_W_H006	Milan	Male	26	Higher education	Average (25-75%)												0	0	N/A	No
MIL_W_P014	MIL_W_H005	Milan	Male	35	Higher education	Average (25-75%)												0	0	N/A	No
MIL_W_P013	MIL_W_H004	Milan	Female	39	Completed secondary education	Average (25-75%)												0	0	No	No
MIL_W_P012	MIL_W_H004	Milan	Male	39	Higher education	Average (25-75%)												0	0	N/A	No
MIL_W_P011	MIL_W_H003	Milan	Male	13	Primary education / Not completed secondary education													0	0	N/A	No
MIL_W_P010	MIL_W_H003	Milan	Female	15	Primary education / Not completed secondary education													0	0	No	No
MIL_W_P009	MIL_W_H003	Milan	Female	47	Higher education	Upper 25%												0	0	No	No
MIL_W_P007	MIL_W_H002	Milan	Female	23	Higher education													0	0	No	No
MIL_W_P006	MIL_W_H002	Milan	Female	56	Higher education													0	0
MIL_W_P005	MIL_W_H002	Milan	Male	57	Higher education	Lower 25%												0	0	No	No
MIL_W_P004	MIL_W_H001	Milan	Female	17	Primary education / Not completed secondary education													0	0	No	No
MIL_W_P003	MIL_W_H001	Milan	Female	20	Completed secondary education			Low blood pressure										1	1	No	No
MIL_W_P002	MIL_W_H001	Milan	Female	54	Higher education	Average (25-75%)												0	0	No	No
MIL_W_P001	MIL_W_H001	Milan	Male	54	Higher education	Average (25-75%)												0	0	N/A	No
THE_W_P064	THE_W_H019	Thessaloniki	Male	3														0	0
THE_W_P063	THE_W_H019	Thessaloniki	Female	9														0	0
THE_W_P087	THE_W_H025	Thessaloniki	Female	13	Primary education / Not completed secondary education	Average (25-75%)												0	0	No	No
THE_W_P086	THE_W_H025	Thessaloniki	Male	18	Completed secondary education	Average (25-75%)												0	0	N/A	No
THE_W_P085	THE_W_H025	Thessaloniki	Female	51	Higher education	Average (25-75%)												0	0	No	No
THE_W_P085	THE_W_H025	Thessaloniki	Female	51	Higher education	Average (25-75%)												0	0
THE_W_P084	THE_W_H025	Thessaloniki	Male	50	Completed secondary education	Lower 25%												0	0	N/A	No
THE_W_P029	THE_W_H010	Thessaloniki	Male	14	Primary education / Not completed secondary education													0	0	N/A	No
THE_W_P027	THE_W_H010	Thessaloniki	Female	48	Higher education	Average (25-75%)												0	0	No	No
THE_W_P080	THE_W_H024	Thessaloniki	Female	44	Higher education	Average (25-75%)		Low blood pressure									TRIGEMINAL NEURALGIA	2	1	No	No
THE_W_P028	THE_W_H010	Thessaloniki	Female	21	Completed secondary education													0	0	No
THE_W_P079	THE_W_H024	Thessaloniki	Male	45	Higher education	Average (25-75%)												0	0	N/A	No
THE_W_P082	THE_W_H024	Thessaloniki	Female	8														0	0
THE_W_P083	THE_W_H024	Thessaloniki	Female	8														0	0
THE_W_P081	THE_W_H024	Thessaloniki	Male	11														0	0	N/A
THE_W_P077	THE_W_H023	Thessaloniki	Female	23	Higher education	Lower 25%												0	0	No	No
THE_W_P076	THE_W_H023	Thessaloniki	Female	52	Higher education	Lower 25%	High blood pressure											1	1	No	No
THE_W_P061	THE_W_H019	Thessaloniki	Male	38	Higher education	Average (25-75%)												0	0	N/A	No
THE_W_P062	THE_W_H019	Thessaloniki	Female	34	Completed secondary education	Average (25-75%)												0	0	No	No
THE_W_P051	THE_W_H016	Thessaloniki	Male	17	Primary education / Not completed secondary education													0	0	N/A	No
THE_W_P050	THE_W_H016	Thessaloniki	Female	47	Higher education	Average (25-75%)												0	0	No	No
THE_W_P049	THE_W_H016	Thessaloniki	Male	52	Higher education	Average (25-75%)												0	0	N/A	No
THE_W_P011	THE_W_H005	Thessaloniki	Male	45	Higher education	Average (25-75%)							Hay fever					1	1	N/A	No
THE_W_P013	THE_W_H005	Thessaloniki	Male	9								Allergies (e.g. pollen allergy)						1	1	N/A	No
ΤΗΕ_W_P012	THE_W_H005	Thessaloniki	Female	44	Completed secondary education	Average (25-75%)						Allergies (e.g. pollen allergy)	Hay fever			Influenza	RHEUMATOID ARTHRITIS, STRESS, IRRITABLE BOWEL	4	1	No	No
THE_W_P017	THE_W_H007	Thessaloniki	Male	21	Completed secondary education							Allergies (e.g. pollen allergy)						1	1	N/A	No
THE_W_P016	THE_W_H007	Thessaloniki	Female	20	Higher education	Lower 25%											Lupus erythematosus	1	1	No	No
THE_W_P043	THE_W_H014	Thessaloniki	Male	7	Primary education / Not completed secondary education													0	0
THE_W_P044	THE_W_H014	Thessaloniki	Male	6	Primary education / Not completed secondary education													0	0
THE_W_P042	THE_W_H014	Thessaloniki	Male	43	Higher education	Average (25-75%)												0	0	N/A	No
THE_W_P041	THE_W_H014	Thessaloniki	Female	44	Higher education	Average (25-75%)												0	0	No	No
THE_W_P007	THE_W_H003	Thessaloniki	Female	40	Higher education	Lower 25%												0	0	No	No
THE_W_P006	THE_W_H003	Thessaloniki	Male	39	Higher education	Average (25-75%)												0	0	N/A
THE_W_P067	THE_W_H020	Thessaloniki	Male	22	Completed secondary education	Average (25-75%)												0	0	N/A	No
THE_W_P066	THE_W_H020	Thessaloniki	Female	58	Completed secondary education	Lower 25%												0	0	No	No
THE_W_P065	THE_W_H020	Thessaloniki	Male	56	Completed secondary education	Average (25-75%)												0	0	N/A	No
THE_W__P073	THE_W_H022	Thessaloniki	Female	52	Higher education	Average (25-75%)												0	0	No	No
THE_W__P074	THE_W_H022	Thessaloniki	Female	26	Higher education	Lower 25%												0	0	No	No
THE_W__P075	THE_W_H022	Thessaloniki	Male	22	Completed secondary education	Lower 25%												0	0	N/A	No
THE_W_P010	THE_W_H004	Thessaloniki	Female	7	Primary education / Not completed secondary education													0	0	No	No
THE_W_P009	THE_W_H004	Thessaloniki	Male	42	Higher education	Average (25-75%)											SLEEP APNEA	1	1	N/A	No
THE_W_P008	THE_W_H004	Thessaloniki	Female	40	Higher education	Average (25-75%)												0	0	No
THE_W_P072	THE_W_H021	Thessaloniki	Female	9	Primary education / Not completed secondary education						Asthma	Allergies (e.g. pollen allergy)						2	1	No	No
THE_W_P071	THE_W_H021	Thessaloniki	Female	11	Primary education / Not completed secondary education													0	0	No	No
THE_W_P070	THE_W_H021	Thessaloniki	Female	14	Primary education / Not completed secondary education													0	0	No	No
THE_W_P069	THE_W_H021	Thessaloniki	Female	44	Higher education													0	0	No	No
THE_W_P068	THE_W_H021	Thessaloniki	Male	47	Higher education	Average (25-75%)												0	0	N/A	No
THE_W_P047	THE_W_H015	Thessaloniki	Male	21	Completed secondary education													0	0	N/A	No
THE_W_P045	THE_W_H015	Thessaloniki	Female	60	Higher education	Average (25-75%)												0	0	No	No
THE_W_P048	THE_W_H015	Thessaloniki	Female	23	Higher education	Lower 25%												0	0	No	No
THE_W_P046	THE_W_H015	Thessaloniki	Male	65	Completed secondary education	Lower 25%	High blood pressure											1	1	N/A	No
THE_W_P021	THE_W_H008	Thessaloniki	Female	5														0	0	No	No
THE_W_P020	THE_W_H008	Thessaloniki	Male	7														0	0	N/A	No
THE_W_P018	THE_W_H008	Thessaloniki	Male	48	Higher education	Average (25-75%)												0	0	N/A	No
THE_W_P019	THE_W_H008	Thessaloniki	Female	43	Higher education	Average (25-75%)		Low blood pressure				Allergies (e.g. pollen allergy)						2	1	No	No
THE_W_P005	THE_W_H002	Thessaloniki	Male	10	Primary education / Not completed secondary education													0	0	N/A	No
THE_W_P004	THE_W_H002	Thessaloniki	Female	43	Higher education	Average (25-75%)												0	0	No	No
THE_W_P003	THE_W_H002	Thessaloniki	Male	46	Higher education	Average (25-75%)			Heart attack	Heart disease								2	1	N/A	No
THE_W_P003	THE_W_H002	Thessaloniki	Female	43	Higher education	Average (25-75%)												0	0	No	No
THE_W_P004	THE_W_H002	Thessaloniki	Male	10	Primary education / Not completed secondary education													0	0	N/A	No
THE_W_P025	THE_W_H009	Thessaloniki	Female	5	Primary education / Not completed secondary education													0	0	No	No
THE_W_P024	THE_W_H009	Thessaloniki	Male	7	Primary education / Not completed secondary education													0	0	N/A	No
THE_W_P023	THE_W_H009	Thessaloniki	Female	44	Higher education	Average (25-75%)												0	0	No	No
THE_W_P022	THE_W_H009	Thessaloniki	Male	52	Higher education	Average (25-75%)	High blood pressure											1	1	N/A	No
THE_W_P035	THE_W_H012	Thessaloniki	Female	5														0	0	No	No
THE_W_P034	THE_W_H012	Thessaloniki	Female	7														0	0	No	No
THE_W_P033	THE_W_H012	Thessaloniki	Male	8														0	0	N/A	No
THE_W_P032	THE_W_H012	Thessaloniki	Female	39	Higher education	Upper 25%												0	0	No	No
THE_W_P031	THE_W_H012	Thessaloniki	Male	41	Higher education	Upper 25%												0	0	N/A	No
THE_W_P056	THE_W_H017	Thessaloniki	Female	6														0	0	No	No
THE_W_P055	THE_W_H017	Thessaloniki	Male	8														0	0	No	No
THE_W_P054	THE_W_H017	Thessaloniki	Female	40	Completed secondary education	Average (25-75%)						Allergies (e.g. pollen allergy)					ALLERGIC RHINITIS	2	1	No	No
THE_W_P053	THE_W_H017	Thessaloniki	Male	48	Completed secondary education	Average (25-75%)						Allergies (e.g. pollen allergy)						1	1	No	No
THE_W_P036	THE_W_H013	Thessaloniki	Female	53	Higher education	Average (25-75%)												0	0	No	No
THE_W_P038	THE_W_H013	Thessaloniki	Male	25	Completed secondary education	Lower 25%												0	0	N/A	No
THE_W_P039	THE_W_H013	Thessaloniki	Female	23	Completed secondary education	Lower 25%												0	0	No	No
THE_W_P037	THE_W_H013	Thessaloniki	Male	53	Higher education	Average (25-75%)												0	0	N/A	No
THE_W_P040	THE_W_H013	Thessaloniki	Female	22	Completed secondary education	Average (25-75%)							Hay fever					1	1	No	No
THE_W_P058	THE_W_H018	Thessaloniki	Female	41	Higher education	Lower 25%					Asthma							1	1	No	No
THE_W_P060	THE_W_H018	Thessaloniki	Female	8	Primary education / Not completed secondary education	Average (25-75%)												0	0	No	No
THE_W_P057	THE_W_H018	Thessaloniki	Male	42	Higher education	Lower 25%											hypothyroid	1	1	N/A	No
THE_W_P059	THE_W_H018	Thessaloniki	Male	10	Primary education / Not completed secondary education	Average (25-75%)					Asthma	Allergies (e.g. pollen allergy)	Hay fever					3	1	N/A	No
THE_W_P030	THE_W_H011	Thessaloniki	Male	33	Higher education	Upper 25%												0	0	N/A	No
THE_W_P002	THE_W_H001	Thessaloniki	Female	11	Primary education / Not completed secondary education	Average (25-75%)												0	0	No	No
THE_W_P001	THE_W_H001	Thessaloniki	Female	43	Higher education	Average (25-75%)												0	0	No	No
THE_W_P015	THE_W_H006	Thessaloniki	Male	38	Higher education	Average (25-75%)												0	0	N/A
THE_W_P014	THE_W_H006	Thessaloniki	Female	34	Higher education	Average (25-75%)						Allergies (e.g. pollen allergy)						1	1	No	No
THE_S_P005	THE_S_H002	Thessaloniki	Male	10	Primary education / Not completed secondary education													0	0	N/A	No
THE_S_P004	THE_S_H002	Thessaloniki	Female	43	Higher education	Average (25-75%)												0	0	No	No
THE_S_P003	THE_S_H002	Thessaloniki	Male	45	Higher education	Lower 25%			Heart attack	Heart disease								2	1	N/A	No
THE_S_P007	THE_S_H003	Thessaloniki	Female	40	Higher education	Average (25-75%)										Influenza		1	1	No	No
THE_S_P006	THE_S_H003	Thessaloniki	Male	39	Higher education	Average (25-75%)										Influenza		1	1	N/A	No
THE_S_P057	THE_S_H001	Thessaloniki	Female	11														0	0	No
THE_S_P056	THE_S_H001	Thessaloniki	Female	43	Higher education	Average (25-75%)												0	0	No
THE_S_P030	THE_S_H011	Thessaloniki	Male	33	Higher education	Upper 25%												0	0	N/A	No
541	541	541	511	507	488	391	32	25	3	9	33	105	51	2	5	5	45	315	194	440	425	18

## Sheet: p.2_income_H
Table S11. Data on annual household income
Household ID	City	What is the annual income of your household?
Open-Ended Response	Response	Response				Table S12. Annual household income
BSL_W_H043	Basel					Annual income level
BSL_W_H042	Basel	Average (25-75%)				All	Frequency	%
BSL_W_H038	Basel	Lower 25%				Lower 25%	41	0.177489
BSL_W_H037	Basel	Average (25-75%)				Average (25-75%)	122	0.528139
BSL_W_H035	Basel					Upper 25%	68	0.294372
BSL_W_H033	Basel	Lower 25%					231	1
BSL_W_H032	Basel
BSL_W_H031	Basel	Average (25-75%)				Ljubljana		%
BSL_W_H030	Basel					Lower 25%	6	0.12766
BSL_W_H029	Basel					Average (25-75%)	28	0.595745
BSL_W_H028	Basel					Upper 25%	13	0.276596
BSL_W_H027	Basel	Average (25-75%)					47	1
BSL_W_H026	Basel
BSL_W_H025	Basel
BSL_W_H024	Basel
BSL_W_H023	Basel
BSL_W_H022	Basel
BSL_W_H021	Basel
BSL_W_H019	Basel	Lower 25%
BSL_W_H018	Basel	Lower 25%
BSL_W_H017	Basel
BSL_W_H016	Basel	Average (25-75%)
BSL_W_H015	Basel
BSL_W_H014	Basel
BSL_W_H013	Basel
BSL_W_H012	Basel
BSL_W_H011	Basel
BSL_W_H010	Basel
BSL_W_H008	Basel
BSL_W_H007	Basel
BSL_W_H006	Basel	Lower 25%
BSL_W_H005	Basel
BSL_W_H004	Basel
BSL_W_H003	Basel
BSL_W_H002	Basel
BSL_W_H001	Basel	Upper 25%
BSL_S_H045	Basel	Lower 25%
BSL_S_H043	Basel	Average (25-75%)
BSL_S_H038	Basel	Lower 25%
BSL_S_H035	Basel	Lower 25%
BSL_S_H032	Basel	Average (25-75%)
BSL_S_H031	Basel	Upper 25%
BSL_S_H030	Basel	Average (25-75%)
BSL_S_H029	Basel	Average (25-75%)
BSL_S_H028	Basel	Average (25-75%)
BSL_S_H027	Basel	Average (25-75%)
BSL_S_H026	Basel	Upper 25%
BSL_S_H025	Basel	Average (25-75%)
BSL_S_H024	Basel	Average (25-75%)
BSL_S_H023	Basel	Average (25-75%)
BSL_S_H022	Basel	Average (25-75%)
BSL_S_H021	Basel	Average (25-75%)
BSL_S_H020	Basel	Lower 25%
BSL_S_H019	Basel	Lower 25%
BSL_S_H018	Basel	Lower 25%
BSL_S_H017	Basel	Lower 25%
BSL_S_H016	Basel	Average (25-75%)
BSL_S_H015	Basel	Average (25-75%)
BSL_S_H014	Basel	Average (25-75%)
BSL_S_H013	Basel	Lower 25%
BSL_S_H012	Basel	Lower 25%
BSL_S_H011	Basel	Lower 25%
BSL_S_H010	Basel	Average (25-75%)
BSL_S_H009	Basel	Average (25-75%)
BSL_S_H008	Basel	Average (25-75%)
BSL_S_H007	Basel	Average (25-75%)
BSL_S_H006	Basel	Lower 25%
BSL_S_H005	Basel	Upper 25%
BSL_S_H004	Basel	Average (25-75%)
BSL_S_H003	Basel	Average (25-75%)
BSL_S_H002	Basel	Average (25-75%)
BSL_S_H001	Basel	Upper 25%
brn_w_h030@icarus2020.ovh	Brno	Upper 25%
brn_w_h029@icarus2020.ovh	Brno	Average (25-75%)
brn_w_h027@icarus2020.ovh	Brno	Lower 25%
brn_w_h026@icarus2020.ovh	Brno	Average (25-75%)
brn_w_h025@icarus2020.ovh	Brno	Upper 25%
brn_w_h024@icarus2020.ovh	Brno	Upper 25%
brn_w_h023@icarus2020.ovh	Brno	Average (25-75%)
brn_w_h020@icarus2020.ovh	Brno	Average (25-75%)
brn_w_h019@icarus2020.ovh	Brno	Upper 25%
brn_w_h018@icarus2020.ovh	Brno	Average (25-75%)
brn_w_h017@icarus2020.ovh	Brno
brn_w_h016@icarus2020.ovh	Brno	Upper 25%
brn_w_h015@icarus2020.ovh	Brno
brn_w_h014@icarus2020.ovh	Brno	Upper 25%
brn_w_h013@icarus2020.ovh	Brno	Upper 25%
brn_w_h012@icarus2020.ovh	Brno	Upper 25%
brn_w_h011@icarus2020.ovh	Brno	Upper 25%
brn_w_h010@icarus2020.ovh	Brno	Lower 25%
brn_w_h009@icarus2020.ovh	Brno	Lower 25%
brn_w_h008@icarus2020.ovh	Brno	Average (25-75%)
brn_w_h007@icarus2020.ovh	Brno	Upper 25%
brn_w_h006@icarus2020.ovh	Brno	Upper 25%
brn_w_h005@icarus2020.ovh	Brno	Upper 25%
brn_w_h004@icarus2020.ovh	Brno	Upper 25%
brn_w_h003@icarus2020.ovh	Brno	Upper 25%
brn_w_h002@icarus2020.ovh	Brno	Average (25-75%)
brn_w_h001@icarus2020.ovh	Brno	Upper 25%
brn_w_h022@icarus2020.ovh	Brno	Average (25-75%)
LJU_W_H036	Ljubljana	Lower 25%
LJU_W_H037	Ljubljana	Average (25-75%)
LJU_W_H038	Ljubljana	Lower 25%
LJU_W_H039	Ljubljana	Upper 25%
LJU_W_H040	Ljubljana	Average (25-75%)
LJU_W_H041	Ljubljana	Average (25-75%)
LJU_W_H042	Ljubljana	Upper 25%
LJU_W_H043	Ljubljana	Average (25-75%)
LJU_W_H044	Ljubljana	Average (25-75%)
LJU_W_H045	Ljubljana	Upper 25%
LJU_W_H046	Ljubljana	Upper 25%
LJU_W_H032	Ljubljana	Average (25-75%)
LJU_W_H035	Ljubljana	Average (25-75%)
LJU_W_H047	Ljubljana	Upper 25%
LJU_W_H048	Ljubljana	Average (25-75%)
LJU_W_H049	Ljubljana	Average (25-75%)
LJU_W_H033	Ljubljana	Average (25-75%)
LJU_W_H050	Ljubljana	Upper 25%
LJU_W_H051	Ljubljana	Average (25-75%)
LJU_W_H052	Ljubljana	Average (25-75%)
LJU_W_H031	Ljubljana	Average (25-75%)
LJU_W_H030	Ljubljana	Average (25-75%)
LJU_W_H029	Ljubljana	Average (25-75%)
LJU_W_H028	Ljubljana	Average (25-75%)
LJU_W_H027	Ljubljana	Average (25-75%)
LJU_W_H025	Ljubljana	Average (25-75%)
LJU_W_H024	Ljubljana	Average (25-75%)
LJU_W_H023	Ljubljana	Upper 25%
LJU_W_H021	Ljubljana	Average (25-75%)
LJU_W_H020	Ljubljana	Upper 25%
LJU_W_H019	Ljubljana	Average (25-75%)
LJU_W_H018	Ljubljana	Lower 25%
LJU_W_H016	Ljubljana	Lower 25%
LJU_W_H015	Ljubljana	Average (25-75%)
LJU_W_H014	Ljubljana	Average (25-75%)
LJU_W_H013	Ljubljana	Upper 25%
LJU_W_H012	Ljubljana	Upper 25%
LJU_W_H011	Ljubljana	Average (25-75%)
LJU_W_H010	Ljubljana	Average (25-75%)
LJU_W_H009	Ljubljana	Average (25-75%)
LJU_W_H008	Ljubljana
LJU_W_H007	Ljubljana	Lower 25%
LJU_W_H006	Ljubljana	Upper 25%
LJU_W_H005	Ljubljana	Lower 25%
LJU_W_H004	Ljubljana	Upper 25%
H003	Ljubljana	Average (25-75%)
H002	Ljubljana	Average (25-75%)
H001	Ljubljana	Upper 25%
55	Madrid	Lower 25%
54	Madrid
53	Madrid	Average (25-75%)
52	Madrid	Average (25-75%)
51	Madrid	Upper 25%
50	Madrid	Average (25-75%)
49	Madrid	Average (25-75%)
48	Madrid	Upper 25%
47	Madrid
46	Madrid
45	Madrid	Average (25-75%)
44	Madrid	Lower 25%
43	Madrid	Average (25-75%)
42	Madrid	Average (25-75%)
41	Madrid	Lower 25%
40	Madrid	Average (25-75%)
39	Madrid	Upper 25%
38	Madrid
37	Madrid	Average (25-75%)
36	Madrid	Average (25-75%)
35	Madrid	Upper 25%
34	Madrid	Upper 25%
33	Madrid	Average (25-75%)
32	Madrid	Average (25-75%)
31	Madrid
30	Madrid
29	Madrid	Upper 25%
28	Madrid	Upper 25%
27	Madrid	Upper 25%
26	Madrid
25	Madrid	Average (25-75%)
24	Madrid	Average (25-75%)
23	Madrid	Upper 25%
22	Madrid	Upper 25%
21	Madrid	Average (25-75%)
20	Madrid	Upper 25%
19	Madrid	Lower 25%
18	Madrid	Upper 25%
17	Madrid	Average (25-75%)
16	Madrid	Upper 25%
15	Madrid
14	Madrid	Average (25-75%)
13	Madrid	Upper 25%
12	Madrid	Upper 25%
12	Madrid	Upper 25%
11	Madrid
10	Madrid	Average (25-75%)
9	Madrid	Average (25-75%)
4	Madrid	Average (25-75%)
8	Madrid	Upper 25%
7	Madrid	Lower 25%
6	Madrid	Lower 25%
5	Madrid
4	Madrid	Lower 25%
3	Madrid	Upper 25%
2	Madrid	Average (25-75%)
1	Madrid	Upper 25%
1	Madrid	Upper 25%
MIL_W_H026	Milan	Average (25-75%)
MIL_W_31	Milan	Average (25-75%)
MIL_W_H038	Milan	Average (25-75%)
MIL_W_H037	Milan	Lower 25%
MIL_W_H036	Milan	Average (25-75%)
MIL_W_H035	Milan	Upper 25%
MIL_W_H034	Milan	Average (25-75%)
MIL_W_H033	Milan	Upper 25%
MIL_W_H032	Milan	Upper 25%
MIL_W_H030	Milan	Upper 25%
MIL_W_H029	Milan	Upper 25%
MIL_W_H028	Milan
MIL_W_H025	Milan	Upper 25%
MIL_W_H024	Milan	Average (25-75%)
MIL_W_H023	Milan	Lower 25%
MIL_W_H022	Milan	Upper 25%
MIL_W_H021	Milan	Lower 25%
MIL_W_H020	Milan	Upper 25%
MIL_W_H019	Milan	Average (25-75%)
MIL_W_H018	Milan	Average (25-75%)
MIL_W_H017	Milan	Upper 25%
MIL_W_H016	Milan	Upper 25%
MIL_W_H015	Milan	Average (25-75%)
MIL_W_H014	Milan	Average (25-75%)
MIL_W_H013	Milan	Average (25-75%)
MIL_W_H012	Milan	Lower 25%
MIL_W_H011	Milan	Average (25-75%)
MIL_W_H010	Milan	Average (25-75%)
MIL_W_H007	Milan	Average (25-75%)
MIL_W_H009	Milan	Average (25-75%)
MIL_W_H008	Milan
MIL_W_H006	Milan
MIL_W_H005	Milan	Average (25-75%)
MIL_W_H004	Milan	Average (25-75%)
MIL_W_H003	Milan	Upper 25%
MIL_W_H002	Milan	Lower 25%
MIL_W_H001	Milan	Upper 25%
THE_W_H019	Thessaloniki	Average (25-75%)
THE_W_H025	Thessaloniki	Lower 25%
THE_W_H010	Thessaloniki	Average (25-75%)
THE_W_H024	Thessaloniki	Average (25-75%)
THE_W_H023	Thessaloniki	Average (25-75%)
THE_W_H016	Thessaloniki	Average (25-75%)
THE_W_H005	Thessaloniki	Average (25-75%)
THE_W_H007	Thessaloniki	Lower 25%
THE_W_H014	Thessaloniki	Average (25-75%)
THE_W_H003	Thessaloniki	Average (25-75%)
THE_W_H020	Thessaloniki	Average (25-75%)
THE_W_H022	Thessaloniki	Average (25-75%)
THE_W_H004	Thessaloniki	Lower 25%
THE_W_H021	Thessaloniki	Average (25-75%)
THE_W_H015	Thessaloniki	Average (25-75%)
THE_W_H008	Thessaloniki	Average (25-75%)
THE_W_H002	Thessaloniki	Average (25-75%)
THE_W_H009	Thessaloniki	Average (25-75%)
THE_W_H012	Thessaloniki	Upper 25%
THE_W_H017	Thessaloniki	Average (25-75%)
THE_W_H013	Thessaloniki	Average (25-75%)
THE_W_H018	Thessaloniki	Lower 25%
THE_W_H011	Thessaloniki	Upper 25%
THE_W_H001	Thessaloniki	Average (25-75%)
THE_W_H006	Thessaloniki	Average (25-75%)
THE_S_H002	Thessaloniki	Average (25-75%)
THE_S_H003	Thessaloniki	Average (25-75%)
THE_S_H001	Thessaloniki	Average (25-75%)
THE_S_H011	Thessaloniki	Upper 25%

## Sheet: p.3_BQ15
Table S13. Data analysis on visualization suggestions by coding
BQ1 – Please enter your individual ID participation number e.g. LJU_S_P050 which your contact person provided (so that we can compare your answers with the sensor results)	BQ15 - If so, what would you like it to contain, i.e., what kind of information would you like to receive, and what kind of data visualization would you like to see?	CODE(s)//Themes in English on visualization	Analysis of individual suggestions
LJU_P001	raw data, API, individualno, več userjev, GPS, svoje podatke in skupnosti (da se primerja območje itd.)	raw data, API, individual exposure, spatial trends, comparison with others	raw data	API	individual exposure	spatial trends	comparison with others
LJU_P002	Grafe	charts	charts
LJU_P003	Vse info, ki ste jih beležili v času + pogovor s strokovnjakom.	all data, consultation with experts	all data	consultation with experts
LJU_P004
LJU_P005	Kot je navedeno v naslednjem vprašanju, predvsem povzetek glavnih rezultatov, primerjava z ostalimi (podobnimi) respondenti in pa morebitne ugotovitve/zaključki raziskave s predlaganimi izboljšavami iz rešitvami.	summary results, comparison with others, suggestions for improvements	summary results	comparison with others	suggestions for improvements
LJU_P006
LJU_P007	Vse pridobljene rezultate v preglednih grafičnih prikazih.	all data, charts	all data	charts
LJU_P008	V opisni obliki z obrazložitvami.	textual, explanations	textual	explanations
LJU_P010	Grafi, povprečna vrednosti in odstopanja, podatki o aktivnosti, podatki o onesnažilih	charts, averages, deviations, activity data, air quality assessment	charts	averages	deviations	activity data	air quality assessment
LJU_P012	Grafi in številčni podatki	charts, numeric	charts	numeric
LJU_P013	Pisna oblika/graf, me zelo zanimajo rezultati!	textual, charts	textual	charts
LJU_P014	Trenutno nimam pričakovanj, in z zanimanjem čakam na rezultate.	summary results	summary results
LJU_P015	Kakovost zraka 24/7 grafi ali numerično NENAVADNE STVARI, npr delo v delavnici (WDKO ipd) PM razporeditev, koliko jih je in kje	all data, charts, numeric, unusual observations, PM how much and where	all data	charts	numeric	unusual observations	PM how much and where
LJU_P016	Primerjava z mejnimi vrednostmi, vpliv na zdravje, čim bolj grafična predstavitev	comparison with limit values, health effects, charts	comparison with limit values	health effects	charts
LJU_P018	Merilne značilnosti, negotovosti, moja izpostavljenost, karakteristične podatke	metrological characteristics, uncertainties, individual exposure, unusual observations	metrological characteristics	uncertainties	individual exposure	unusual observations
LJU_P019	Želim tabelarični in grafični izpis merjenih parametrov z dodanimi mejnimi vrednostmi	numeric, charts, comparison with limit values	numeric	charts	comparison with limit values
LJU_P020	Graf srčnega utripa in delcev v ozračju v odvisnosti od časa, rad bi primerjal okolje in število delcev v zraku	charts, heart rate, PM, time trends, comparison between locations	charts	heart rate	PM	time trends	comparison between locations
LJU_P021	Rezultati naj bojo v surovi obliki + poročilo o rezultatih meritev	raw data, summary results	raw data	summary results
LJU_P022	Tabelirane vrednosti mejnih parametrov lokacij, grafi, primerjava z ostalimi, vse!!	all data, numeric, comparison with limit values, charts, tablular, charts, comparison with others	all data	numeric	comparison with limit values	charts	charts	comparison with others
LJU_P023	Čim več možnih informacij	all data	all data
LJU_P024	Želim prejeti seznam o onesnaženju zraka na različnih lokacijah	spatial trends	spatial trends
LJU_P025
LJU_P026	Kakšna je onesnaženost zraka v mojem vsakdanu, kakšni onesnaženosti sem izpostavljena jaz, kaj lahko naredim, da izboljšam izpostavljenost onesnaženosti.	individual exposure, suggestions for improvements	individual exposure	suggestions for improvements
LJU_P027	Pričakujem, da ni velikega onesnaženja. Lahko dobim neobdelane podatke, zanimajo me vsi pridobljeni podatki.	raw data, all data	raw data	all data
LJU_P028	graf + številčne	charts, numeric	charts	numeric
LJU_P029	Čim več podatkov, tudi če so ne obdelani, na koncu obdelave-kakšen graf in primerjavo s povprečjem	all data, raw data, charts, comparison with others	all data	raw data	charts	comparison with others
LJU_P030	O vplivu zraka v okolju na telo, tudi v odvisnosti od ostalih pridobljenih podatkov oz informaciji o temu v kakšnem okolju živi moja družina	individual exposure, health effects	individual exposure	health effects
LJU_P031	Pričakujem grafično in numerično predstavitev rezultatov, vsak dan posebej, z vnešenimi označenimi aktivnostmi. Upam, da čim prej vidim rezultate, da lahko v bodoče kaj izboljšam.	charts, numeric, time trends, individual exposure	charts	numeric	time trends	individual exposure
LJU_P032	povprečja, relativno na ostale, ocena stanja okolja, priporočila	averages, comparison with others, air quality assessment, suggestions for improvements	averages	comparison with others	air quality assessment	suggestions for improvements
LJU_P033	Podobno kot pri zdravniku, rang vrednosti+norme vrednosti, tabela, tekst+graf z razlago	similar to doctors reports, range, comparison with limit values, numeric, textual, charts, explanations	similar to doctors reports	range	comparison with limit values	numeric	textual	charts	explanations
LJU_P034	raw data (redable)+povzetek, zaklučki	raw data, summary results, conclusions	raw data	summary results	conclusions
LJU_P035
LJU_P036
LJU_P038	Prikaz rezultatov v primerjavi s tipičnimi vrednostmi (kritične vrednosti)	comparison with limit values	comparison with limit values
LJU_P039	Predstavitev rezultatov v primerjavi s skupnimi vrednostmi	comparison with others	comparison with others
LJU_P040
LJU_P042	Povzetek v kakršnikoli obliki	summary results	summary results
LJU_P044	Grafi (osnovni, časovni potek), mejne vrednosti	charts, time trends, comparison with limit values	charts	time trends	comparison with limit values
LJU_P045	Tabele mojih, ostalih in priporočenih vrenosti	numeric, comparison with others, comparison with limit values	numeric	comparison with others	comparison with limit values
LJU_P046	Tabelični prikaz vseh rezultatov (konc.) in priporočene varne vrednosti za primerjavo Povprečne vrednosti, vrednosti v odvisnosti od časa in kraja Osebni podatki, skupni vsebinski podatki ostalih	numeric, comparison with limit values, averages, spatial trends, time trends, comparison with others	numeric	comparison with limit values	averages	spatial trends	time trends	comparison with others
LJU_P047	Mogoče kak kratek povzetek izpostavljenosti onesnažilom, da bi lahko, če je nujno, spremenil obnašanje.	summary results	summary results
LJU_P048	From Q17c pregled v daljšem čas.obdobju/teden/mesec/leto	time trends	time trends
LJU_P049	Načeloma kratke, grafi (s časovni trendi), prostorski prikaz	summary results, charts, time trends, spatial trends	summary results	charts	time trends	spatial trends
LJU_P051	Digitalni, karkoli	electronically	electronically
LJU_P054	PDF, karkoli, generalni povzetek	summary results, PDF	summary results	PDF
LJU_P056	Elektronsko, grafi, povzetek z razlago	electronically, charts, summary results, explanations	electronically	charts	summary results	explanations
LJU_P057	Elektronsko, grafi	electronically, charts	electronically	charts
LJU_P058	Grafično v času in prostoru	charts, spatial trends, time trends	charts	spatial trends	time trends
LJU_P059	Želim si videti vse podatke, ki so jih naprave zabeležile. Saj mi bo zanimivo videti kakšno onesnaženje zraka je v različnih prostorih, kjer se zadržujemo. Z same ure pa kakšen vpogled v srčni ritem oziroma kakšne druge zanimive podatke za zdravje.	all data, spatial trends, heart rate, health effects	all data	spatial trends	heart rate	health effects
LJU_P060	Da je zrak vsaj malo čist	clean air	clean air
LJU_P061	Kakovost zraka, podatke z ure	all data	all data
LJU_P062	Osnovne podatke v fromatu excel datoteke	summary results, excel	summary results	excel
LJU_P063
LJU_P064	V excel datoteki in praktično, če se da s komentarji in kombinacijo parametrov \"query\". Izpostava najpomembnejših ugotovitev in primerjava z drugimi referenčnimi skupinami.	excel, explanations, summary results, comparison with others	excel	explanations	summary results	comparison with others
LJU_P065	Samo rezultate meritev v katerikoli obliki	summary results	summary results
LJU_P066
LJU_P067
LJU_P068	Grafi, tekst, slike, vse	all data, charts, textual, graphs	all data	charts	textual	graphs
LJU_P070	Kakovost zraka glede na različne lokacije	spatial trends	spatial trends
LJU_P071
LJU_P072	Želim izvedeti za obremenitve onesnaženja, grafično prikazani rezultati za enostavno razumevanje, tudi podane zakonsko določene vrednosti onesnažil, mejne koncentracije, ki so že varne za zdravje, seznam virov onesnaženja v okolju	individual exposure, charts, simple, comparison with limit values, list of pollution sources	individual exposure	charts	simple	comparison with limit values	list of pollution sources
LJU_P073	Želim prejeti grafični prikaz izpostavljenosti škodljivim snovem	individual exposure, charts	individual exposure	charts
LJU_P074
LJU_P075	Da je zrak v moji okolici sorazmerno čist	clean air	clean air
LJU_P076	Predvsem vse rezultate in ocene	all data, individual exposure	all data	individual exposure
LJU_P077	Želela bi dobiti informacije, kakšen je zrak doma in v moji okolici. Super bi bilo, če bi v obvestilu dobili kakšne nasvete (npr več zračite ipd.)	air quality assessment, suggestions for improvements	air quality assessment	suggestions for improvements
LJU_P078	Kakršnikoli grafi, lokacijsko	charts, spatial trends	charts	spatial trends
LJU_P079	karšnekoli,elektronski	summary results, electronic	summary results	electronic
LJU_P080	Digitalna, raw data, proporcialna (mejne vrednosti)	electronic, raw data, comparison with limit values	electronic	raw data	comparison with limit values
LJU_P081	raw data	raw data	raw data
LJU_P082	CO2 indoors: graf ali pa surove	charts, raw data, CO2 indoors	charts	raw data	CO2 indoors
LJU_P083	V grafični obliki	charts	charts
LJU_P084	v kakršni obliki	summary results	summary results
LJU_P085	V kakršnikoli obliki	summary results	summary results
LJU_P086	Da, v grafični in tabelični obliki	charts, numeric	charts	numeric
LJU_P090	kakšno je onesnaženje	air quality assessment	air quality assessment
LJU_P091	kakšno je onesnaženje	air quality assessment	air quality assessment
LJU_P092	Kakšno je onesnaženje	air quality assessment	air quality assessment
LJU_P093	Onesnaženost in fizična aktivnost v odvisnosti od ure z kratkimi časovnimi intervali (1s), v elektronski obliki, v tabeli	individual exposure assessment, time trends, numeric, electronic	individual exposure assessment	time trends	numeric	electronic
LJU_P094	Stopnjo različnih plinov, srčni utrip, stres. V obliki grafa.	air quality assessment, heart rate, stress level, charts	air quality assessment	heart rate	stress level	charts
LJU_P095	Preprost prikaz rezultatov - informacije, kje sem najbolj izpostavljena onesnaženju.	simple ilustration, spatial trends, individual exposure	simple ilustration	spatial trends	individual exposure
LJU_P097	Želim prejeti vse podatke, ki so jih naprave zabeležile (tako glede onesnaženja/kakovosti zraka v prostoru, kjer se zadržujem, kot tudi glede zdravja-stanja)	all data, air quality assessment, individual exposure, spatial trends, health effects	all data	air quality assessment	individual exposure	spatial trends	health effects
82			71
											Table S14. Summary of visualization suggestions
											Visualization ideas	num of ideas brought up	% of total suggestions	% people *
											charts, graphs	29	0.408451	0.353659
											summary results	15	0.211268	0.182927
											individual exposure	11	0.15493	0.134146
											all data	12	0.169014	0.146341
											numeric	11	0.15493	0.134146
											raw data, excel	10	0.140845	0.121951
											spatial trends	10	0.140845	0.121951
											comparison with limit values	10	0.140845	0.121951
											comparison with others	9	0.126761	0.109756
											air quality assessment	8	0.112676	0.097561
											time trends	8	0.112676	0.097561
											electronic, PDF	7	0.0985915	0.0853659
											health effects	4	0.056338	0.0487805
											suggestions for improvements	4	0.056338	0.0487805
											textual	4	0.056338	0.0487805
											explanations	4	0.056338	0.0487805
											heart rate	3	0.0422535	0.0365854
											averages	3	0.0422535	0.0365854
											PM how much and where, PM	3	0.0422535	0.0365854
											unusual observations	2	0.028169	0.0243902
											simple ilustration, simple	2	0.028169	0.0243902
											clean air	2	0.028169	0.0243902
											API	1	0.0140845	0.0121951
											consultation with experts	1	0.0140845	0.0121951
											stress level	1	0.0140845	0.0121951
											CO2 indoors	1	0.0140845	0.0121951
											list of pollution sources	1	0.0140845	0.0121951
											conclusions	1	0.0140845	0.0121951
											metrological characteristics	1	0.0140845	0.0121951
											uncertainties	1	0.0140845	0.0121951
											range	1	0.0140845	0.0121951
											similar to doctors reports	1	0.0140845	0.0121951
											activity data	1	0.0140845	0.0121951
											deviations	1	0.0140845	0.0121951
											comparison between locations	1	0.0140845	0.0121951
											* people had several suggestions
											Table S14. Summary of visualization suggestions
											Visualization ideas	num of ideas brought up	% of total suggestions	% people *
											charts, graphs	29	0.408451	0.353659
											summary results	15	0.211268	0.182927
											individual exposure	11	0.15493	0.134146
											all data	12	0.169014	0.146341
											numeric	11	0.15493	0.134146
											raw data, excel	10	0.140845	0.121951
											spatial trends	10	0.140845	0.121951
											comparison with limit values	10	0.140845	0.121951
											comparison with others	9	0.126761	0.109756
											air quality assessment	8	0.112676	0.097561
											time trends	8	0.112676	0.097561
											electronic, PDF	7	0.0985915	0.0853659
											health effects	4	0.056338	0.0487805
											suggestions for improvements	4	0.056338	0.0487805
											textual	4	0.056338	0.0487805
											explanations	4	0.056338	0.0487805
											heart rate	3	0.0422535	0.0365854
											averages	3	0.0422535	0.0365854
											PM how much and where, PM	3	0.0422535	0.0365854
											unusual observations	2	0.028169	0.0243902
											simple ilustration, simple	2	0.028169	0.0243902
											clean air	2	0.028169	0.0243902
											API	1	0.0140845	0.0121951
											consultation with experts	1	0.0140845	0.0121951
											stress level	1	0.0140845	0.0121951
											CO2 indoors	1	0.0140845	0.0121951
											list of pollution sources	1	0.0140845	0.0121951
											conclusions	1	0.0140845	0.0121951
											metrological characteristics	1	0.0140845	0.0121951
											uncertainties	1	0.0140845	0.0121951
											range	1	0.0140845	0.0121951
											similar to doctors reports	1	0.0140845	0.0121951
											activity data	1	0.0140845	0.0121951
											deviations	1	0.0140845	0.0121951
											comparison between locations	1	0.0140845	0.0121951
													2.59155	2.2439
											* people had several suggestions

## Sheet: p.4_BQ16
Table S15. Raw data on user interest on pre-determined visualization suggestions
			BQ16 - How interested are you in the following?
BQ1 – Please enter your individual ID participation number e.g. LJU_S_P050 which your contact person provided (so that we can compare your answers with the sensor results)	BQ15 - If so, what would you like it to contain, i.e., what kind of information would you like to receive, and what kind of data visualization would you like to see?	BQ15-CODEs - visualization	a) Where your maximum/minimum air pollution exposure occurs	b) During which activity you are most/least exposed to air pollution	c) Which transportation mode contributes the most/least to your air pollution exposure	d) Individual pollution concentrations	e) Map of your weekly whereabouts with indicative colour codes	f) Is my weekly dose of air pollution less or more than others who participated?	g) Suggestions to reduced your air pollution exposure			Table S16. Frequency table of user interest on pre-determined visualization suggestions
LJU_P001	Raw data, API, individualno, več userjev, GPS, svoje podatke in skupnosti (da se primerja območje itd.)	Raw data, API, individual exposure, spatial trends, comparison with others	5	5	5	5	5	2	5					a	b	c	d	e	f	g	ALL
LJU_P002	Grafe	Charts	4	5	5	5	5	5	3				Bin	Frequency	Frequency	Frequency	Frequency	Frequency	Frequency	Frequency	Frequency
LJU_P003	Vse info, ki ste jih beležili v času + pogovor s strokovnjakom.	All data, consultation with experts	5	5	5	5	5	5	5			Not interested	1	1	1	3	1	1	3	2	13
LJU_P004			5	5	3	5	5	3	5				2	1	2	1	1	4	2	0	13
LJU_P005	Kot je navedeno v naslednjem vprašanju, predvsem povzetek glavnih rezultatov, primerjava z ostalimi (podobnimi) respondenti in pa morebitne ugotovitve/zaključki raziskave s predlaganimi izboljšavami iz rešitvami.	summary results, comparison with others, suggestions for improvements	5	5	4	5	5	5	5				3	3	2	12	8	11	10	7	56
LJU_P006													4	8	11	7	17	10	11	12	80
LJU_P007	Vse pridobljene rezultate v preglednih grafičnih prikazih.	All measured parameters, charts	5	5	5	5	4	4	5			Very interested	5	63	60	53	48	50	50	54	383
LJU_P008	V opisni obliki z obrazložitvami.	Textual, explanations	5	5	5		4	4	5				sum	76	76	76	75	76	76	75	545
LJU_P010	Grafi, povprečna vrednosti in odstopanja, podatki o aktivnosti, podatki o onesnažilih	Charts, averages, deviations, activity data, pollution data	5	4	5	4	5	5	5
LJU_P012	Grafi in številčni podatki	Charts, numerical values	5	5	5	5	4	5	5
LJU_P013	Pisna oblika/graf, me zelo zanimajo rezultati!	Textual, charts	5	5	5	5	5	5	5
LJU_P014	Trenutno nimam pričakovanj, in z zanimanjem čakam na rezultate.	summary results	1	1	1	1	1	1	1
LJU_P015	Kakovost zraka 24/7 grafi ali numerično NENAVADNE STVARI, npr delo v delavnici (WDKO ipd) PM razporeditev, koliko jih je in kje	All data, charts, numerical values, unusual observations, PM how much and where	5	5	5	5	3	4	4
LJU_P016	Primerjava z mejnimi vrednostmi, vpliv na zdravje, čim bolj grafična predstavitev	comparison with limit values, health effects, charts	5	5	4	5	5	5	5				Table S17. Frequency % table of user interest on pre-determined visualization suggestions
LJU_P018	Merilne značilnosti, negotovosti, moja izpostavljenost, karakteristične podatke	metrological characteristics, uncertainties, individual exposure, unusual observations	5	4	3	5	3	5	3
LJU_P019	Želim tabelarični in grafični izpis merjenih parametrov z dodanimi mejnimi vrednostmi	numeral values, charts, comparison with limit values	5	5	5	5	5	5	5					1	2	3	4	5
LJU_P020	Graf srčnega utripa in delcev v ozračju v odvisnosti od časa, rad bi primerjal okolje in število delcev v zraku	charts, heart rate, PM, time trends, comparison between locations	5	5	5	5	5	4	4				a)	0.0131579	0.0131579	0.0394737	0.105263	0.828947
LJU_P021	Rezultati naj bojo v surovi obliki + poročilo o rezultatih meritev	raw data, summary results	5	5	5	5	5	5	5				b)	0.0131579	0.0263158	0.0263158	0.144737	0.789474
LJU_P022	Tabelirane vrednosti mejnih parametrov lokacij, grafi, primerjava z ostalimi, vse!!	all data, numerical values, comparison with limit values, charts, , tablular, charts, comparison with others	5	5	5	5	4	5	5				c)	0.0394737	0.0131579	0.157895	0.0921053	0.697368
LJU_P023	Čim več možnih informacij	all data	5	5	5	5	5	5	5				d)	0.0133333	0.0133333	0.106667	0.226667	0.64
LJU_P024	Želim prejeti seznam o onesnaženju zraka na različnih lokacijah	spatial trends	3	5	4	4	5	5	4				e)	0.0131579	0.0526316	0.144737	0.131579	0.657895
LJU_P025			5	5	5	5	5	5	5				f)	0.0394737	0.0263158	0.131579	0.144737	0.657895
LJU_P026	Kakšna je onesnaženost zraka v mojem vsakdanu, kakšni onesnaženosti sem izpostavljena jaz, kaj lahko naredim, da izboljšam izpostavljenost onesnaženosti.	individual exposure, suggestions for improvements	5	5	5	4	5	5	5				g)	0.0266667	0	0.0933333	0.16	0.72
LJU_P027	Pričakujem, da ni velikega onesnaženja. Lahko dobim neobdelane podatke, zanimajo me vsi pridobljeni podatki.	raw data, all data	5	5	5	5	5	5	5
LJU_P028	graf + številčne	charts, numerical values	3	3	3	3	2	3	3
LJU_P029	Čim več podatkov, tudi če so ne obdelani, na koncu obdelave-kakšen graf in primerjavo s povprečjem	all data, raw data, charts, comparison with others	5	5	3	5	5	5	5
LJU_P030	O vplivu zraka v okolju na telo, tudi v odvisnosti od ostalih pridobljenih podatkov oz informaciji o temu v kakšnem okolju živi moja družina	individual exposure, health effects	4	4	4	4	3	3	4
LJU_P031	Pričakujem grafično in numerično predstavitev rezultatov, vsak dan posebej, z vnešenimi označenimi aktivnostmi. Upam, da čim prej vidim rezultate, da lahko v bodoče kaj izboljšam.	charts, numerical values, time trends, individual exposure	5	5	5	5	5	5	5
LJU_P032	povprečja, relativno na ostale, ocena stanja okolja, priporočila	averages, comparison with others, Air quality assessment, suggestions for improvements	4	5	5	5	3	5	5
LJU_P033	Podobno kot pri zdravniku, rang vrednosti+norme vrednosti, tabela, tekst+graf z razlago	Similar to doctors reports, range, recomended values, numerical values, textual, charts, explanations	5	5	3	5	5	5	5
LJU_P034	Raw data (redable)+povzetek, zaklučki	raw data, summary results, conclusions	5	5	5	5	5	5	5
LJU_P035
LJU_P036
LJU_P038	Prikaz rezultatov v primerjavi s tipičnimi vrednostmi (kritične vrednosti)	comparison with limit values	5	5	4	4	3	5	4
LJU_P039	Predstavitev rezultatov v primerjavi s skupnimi vrednostmi	comparison with others	4	5	3	4	4	4	4
LJU_P040			4	4	3	4	3	4	3
LJU_P042	Povzetek v kakršnikoli obliki	summary results	5	2	5	2	5	2	5
LJU_P044	Grafi (osnovni, časovni potek), mejne vrednosti	Charts, time trends, comparison with limit values	5	5	5	3	4	1	1
LJU_P045	Tabele mojih, ostalih in priporočenih vrenosti	numerical values, comparison with others, comparison with limit values	5	5	5	5	5	5	5
LJU_P046	Tabelični prikaz vseh rezultatov (konc.) in priporočene varne vrednosti za primerjavo Povprečne vrednosti, vrednosti v odvisnosti od časa in kraja Osebni podatki, skupni vsebinski podatki ostalih	numerical values, comparison with limit values, averages, spatial trends, time trends, comparison with others	5	5	5	5	5	5	5
LJU_P047	Mogoče kak kratek povzetek izpostavljenosti onesnažilom, da bi lahko, če je nujno, spremenil obnašanje.	summary results	3	4	1	4	5	3	5
LJU_P048	From Q17c pregled v daljšem čas.obdobju/teden/mesec/leto	time trends
LJU_P049	Načeloma kratke, grafi (s časovni trendi), prostorski prikaz	summary results, charts, time trends, spatial trends	5	5	2	4	5	5	5
LJU_P051	Digitalni, karkoli	electronically	5	5	5	3	5	5	5
LJU_P054	PDF, karkoli, generalni povzetek	summary results, PDF	5	5	1	3	5	3	4
LJU_P056	Elektronsko, grafi, povzetek z razlago	Electronically, charts, sumamry results, explanations	5	4	5	3	5	5	4
LJU_P057	Elektronsko, grafi	Electronically, Charts	5	5	5	3	5	5	4
LJU_P058	Grafično v času in prostoru	charts, spatial trends, time trends	5	5	5	5	5	5	5
LJU_P059	Želim si videti vse podatke, ki so jih naprave zabeležile. Saj mi bo zanimivo videti kakšno onesnaženje zraka je v različnih prostorih, kjer se zadržujemo. Z same ure pa kakšen vpogled v srčni ritem oziroma kakšne druge zanimive podatke za zdravje.	all data, spatial trends, heart rate, health effects	5	5	5	5	5	3	5
LJU_P060	Da je zrak vsaj malo čist	that the results would show how the air is even a bit clean	5	3	5	5	5	5	5
LJU_P061	Kakovost zraka, podatke z ure	all data	5	5	5	5	3	3	4
LJU_P062	Osnovne podatke v fromatu excel datoteke	summary results, excel	5	5	3	3	2	3	3
LJU_P063			5	5	5	5	4	5	5
LJU_P064	V Excel datoteki in praktično, če se da s komentarji in kombinacijo parametrov \"query\". Izpostava najpomembnejših ugotovitev in primerjava z drugimi referenčnimi skupinami.	excel, explanations, summary results, comparison with others	5	5	3	4	4	5	5
LJU_P065	Samo rezultate meritev v katerikoli obliki	summary results	4	4	4	4	2	3	4
LJU_P066
LJU_P067
LJU_P068	Grafi, tekst, slike, vse	all data, charts, textual, graphs	5	5	5	5	5	5	5
LJU_P070	Kakovost zraka glede na različne lokacije	spatial trends	5	5	5	5	5	5	5
LJU_P071			5	5	5	5	5	5	5
LJU_P072	Želim izvedeti za obremenitve onesnaženja, grafično prikazani rezultati za enostavno razumevanje, tudi podane zakonsko določene vrednosti onesnažil, mejne koncentracije, ki so že varne za zdravje, seznam virov onesnaženja v okolju	individual exposure, charts, simple, comparison with limit values, list of pollution sources	5	5	5	5	3	4	5
LJU_P073	Želim prejeti grafični prikaz izpostavljenosti škodljivim snovem	individual exposure, charts	5	5	5	5	5	5	5
LJU_P074			5	5	3	5	5	5	5
LJU_P075	Da je zrak v moji okolici sorazmerno čist	cleaner air	5	4	5	4	4	4	3
LJU_P076	Predvsem vse rezultate in ocene	all data, individual exposure	5	5	5	5	3	5	5
LJU_P077	Želela bi dobiti informacije, kakšen je zrak doma in v moji okolici. Super bi bilo, če bi v obvestilu dobili kakšne nasvete (npr več zračite ipd.)	Air quality assessment, suggestions for improvements	5	5	5	5	3	5	5
LJU_P078	Kakršnikoli grafi, lokacijsko	charts, spatial trends	5	4	5	4	5	4	5
LJU_P079	karšnekoli,elektronski	summary results, electronic	5	5	5	5	5	5	5
LJU_P080	Digitalna, raw data, proporcialna (mejne vrednosti)	electronic, raw data, comparison with limit values	5	5	5	4	3	4	5
LJU_P081	Raw data	raw data	5	5	5	4	4	5
LJU_P082	CO2 indoors: graf ali pa surove	charts, raw data, CO2 indoors	2	2	4	4	5	5	5
LJU_P083	V grafični obliki	charts	5	5	5	5	5	5	5
LJU_P084	v kakršni obliki	summary results	5	5	5	5	5	5	5
LJU_P085	V kakršnikoli obliki	summary results	5	5	5	5	5	5	5
LJU_P086	Da, v grafični in tabelični obliki	charts, numerical	5	5	3	5	5	5	5
LJU_P090	kakšno je onesnaženje	Air quality assessment	5	5	5	5	5	5	5
LJU_P091	kakšno je onesnaženje	Air quality assessment	5	5	5	5	5	5	5
LJU_P092	Kakšno je onesnaženje	Air quality assessment	5	5	5	5	5	5	5
LJU_P093	Onesnaženost in fizična aktivnost v odvisnosti od ure z kratkimi časovnimi intervali (1s), v elektronski obliki, v tabeli	individual exposure assessment, time trends, numerical values, electronic	5	5	5	5	5	5	5
LJU_P094	Stopnjo različnih plinov, srčni utrip, stres. V obliki grafa.	air quality assessment, heart rate, stress level, charts	4	4	5	3	5	4	4
LJU_P095	Preprost prikaz rezultatov - informacije, kje sem najbolj izpostavljena onesnaženju.	Simple ilustration, spatial trends, individual exposure	4	4	3	4	2	3	3
LJU_P097	Želim prejeti vse podatke, ki so jih naprave zabeležile (tako glede onesnaženja/kakovosti zraka v prostoru, kjer se zadržujem, kot tudi glede zdravja-stanja)	all data, air quality assessment, individual exposure, spatial trends, health effects	5	5	5	5	5	1	5
		AVERAGE:	4.72368	4.67105	4.39474	4.46667	4.36842	4.35526	4.54667
82
			4.72368	a) Where your maximum/minimum air pollution exposure occurs
			4.67105	b) During which activity you are most/least exposed to air pollution
			4.54667	g) Suggestions to reduced your air pollution exposure
			4.46667	d) Individual pollution concentrations
			4.39474	c) Which transportation mode contributes the most/least to your air pollution exposure
			4.36842	e) Map of your weekly whereabouts with indicative colour codes
			4.35526	f) Is my weekly dose of air pollution less or more than others who participated?

## Sheet: p.5_AQ3
Table S18. Data on surprices in the results
AQ1 – Please enter your individual ID participation number e.g. LJU_S_P050 which your contact person provided (so that we can compare your answers with the sensor results)	AQ3a – Were you surprised by any of the results, If yes, please describe your surprise? Yes=1, No=2, =empty	AQ3b – Were you surprised by any of the results, If yes, please describe your surprise?	AQ3b-CODEs - surprices in the results
											Table S19. Amount of participants who got surpriced by the results
												num of answers	% of those who answered	% of all
											Yes	14	0.482759	0.451613
											No	15	0.517241	0.483871
LJU_P005	2										no answer	2		0.0645161
LJU_P008	1	Predvsem me je presenetila analiza podatkov pri povprečnih PM vrednosti glede na aktivnosti posameznika.	surpriced about PM analysis of averages by activity								Table S20. List of descriptions of surprices
											- surpriced about PM analysis of averages by activity
LJU_P012	2										- lower temperature at summer than winter, PM10 and PM2.5 values
LJU_P013	2										- PM10 and PM2.5 values
											- high concentration of CO2
											- how much less CO2 when the house is empty
LJU_P016	1	Nižja temperatura poleti kot pozimi, vrednost delcev PM10 in 2,5	lower temperature at summer than winter, PM10 and PM2.5 values								- high humidity during summer
LJU_P018	2										- high PM during sleeping, whiel havign open window. Perhaps not the best idea.
LJU_P019	1	Vrednosti PM2.5 in PM10	PM10 and PM2.5 values								- TVOC peaks durign winter and NO2 peaks during summer
											- low PM concentration in a home located in the city center
											- low stress levels
LJU_P022	2										- high CO2 at summer with more frequent ventilation
LJU_P023	1	Velika koncentracija CO2.	high concentration of CO2								- Dissapointed that PPM did not work, yet all efforts were made to carry it around
LJU_P024	1	Koliko manj CO2 je bilo, ko nas ni bilo doma.	how much less CO2 when the house is empty								- low stress levels, the influence of opening windows on air quality
											- too high heart rate
LJU_P027	1	Visoka relativna vlažnost poleti	high humidity during summer
LJU_P032
LJU_P037	1	Kar se tiče osebnih podatkov, so me presenetile najvišje PM vrednosti med spanjem, se pravi ponoči. Spim pri odprtem oknu, kar pa očitno ni najboljša ideja?	high PM during sleeping, whiel havign open window. Perhaps not the best idea.
LJU_P044	1	V stanovanju so me presenetile občasno povišane koncentracije TVOC v zimskem času in občasno povišane koncentracije NO2 v poletnem času.	TVOC peaks durign winter and NO2 peaks during summer
LJU_P045	1	Da je bila izpostavlejn ost trdnim delcem veliko pod mejo, saj zivim v centru mesta	low PM concentration in a home located in the city center
LJU_P048
LJU_P051	2
LJU_P054	2
LJU_P056	2
LJU_P058	1	Mislil/a sem da sem izpostavljen/a veliko višji stopnji stresa kot ga opisujejo številke očitno imam še veliko rezerve :)	low stress levels
LJU_P059	1	Stopnja CO2 poleti v hiši, saj bi pričakoval da se ob velikem zračenju poleti le tega manj zadržuje v prostoru.	high CO2 at summer with more frequent ventilation
LJU_P060	1	Podatkov iz PM10 sezorja ni bilo. Glede na to da sem ga nosil povsod je to malce razočaralo.	Dissapointed that PPM did not work, yet all efforts were made to carry it around
LJU_P061	2
LJU_P062	2
LJU_P065	2
LJU_P068	2
LJU_P076	2
LJU_P078	1	Nižja raven stresa, kot sem pričakoval :) Tudi velik vpliv prezračevanja na kakovost zraka.	low stress levels, the influence of opening windows on air quality
LJU_P079	1	Moj (previsok) srčni utrip	too high heart rate
LJU_P081	2
LJU_P082	2
	29

## Sheet: p.6_AQ2
Table S21. Data on evaluation of receieved results report
	AQ2 Please choose the option that best describes your opinion about the result report
AQ1 – Please enter your individual ID participation number e.g. LJU_S_P050 which your contact person provided (so that we can compare your answers with the sensor results)	AQ2a - The information I received in the report was easy to understand (1) Agree … (5) Disagree	AQ2b - The information I received was useful to me (1) Agree … (5) Disagree	AQ2c - The amount of information I received in the report was: (1) Too little, (2), (3) Just right, (4), (5) Too much
								Table S22. Evaluation of received results report: general statistics
								AQ2a - The information I received in the report was easy to understand (1) Agree … (5) Disagree
								AQ2a		AQ2b		AQ2c
LJU_P005	1	1	4
								Mean	1.58621	Mean	1.68966	Mean	3.17241
								Standard Error	0.182466	Standard Error	0.165374	Standard Error	0.10011
LJU_P008	1	1	4					Median	1	Median	1	Median	3
								Mode	1	Mode	1	Mode	3
LJU_P012	1	1	4					Standard Deviation	0.982607	Standard Deviation	0.890564	Standard Deviation	0.539111
LJU_P013	4	4	4					Sample Variance	0.965517	Sample Variance	0.793103	Sample Variance	0.29064
								Kurtosis	0.748197	Kurtosis	-0.0491309	Kurtosis	0.35937
								Skewness	1.44001	Skewness	1.00703	Skewness	0.157195
LJU_P016	2	2	3					Range	3	Range	3	Range	2
LJU_P018	1	1	3					Minimum	1	Minimum	1	Minimum	2
LJU_P019	1	1	3					Maximum	4	Maximum	4	Maximum	4
								Sum	46	Sum	49	Sum	92
								Count	29	Count	29	Count	29
LJU_P022	1	2	3					Largest(1)	4	Largest(1)	4	Largest(1)	4
LJU_P023	3	2	3					Smallest(1)	1	Smallest(1)	1	Smallest(1)	2
LJU_P024	2	3	3					Confidence Level(95.0%)	0.373764	Confidence Level(95.0%)	0.338752	Confidence Level(95.0%)	0.205067
							Table S23. Evaluation of received results report: understandability
LJU_P027	1	1	3					AQ2a understandability
								Bin	Frequency	Cumulative %	Bin	Frequency	Cumulative %
							I agree	1	20	0.689655	1	20	0.689655
								2	3	0.793103	3	4	0.827586	79% agree they were easy to understand and
								3	4	0.931034	2	3	0.931034
LJU_P032								4	2	1	4	2	1
							I disagree	5	0	1	5	0	1
								More	0	1	More	0	1
LJU_P037	1	2	2				Table S24. Evaluation of received results report: usability
								AQ2b Usability
								Bin	Frequency	Cumulative %	Bin	Frequency	Cumulative %
							I agree	1	16	0.551724	1	16	0.551724
								2	7	0.793103	2	7	0.793103	79% agree they were useful
LJU_P044	1	1	3					3	5	0.965517	3	5	0.965517
LJU_P045	1	1	3					4	1	1	4	1	1
							I disagree	5	0	1	5	0	1
								More	0	1	More	0	1
LJU_P048
LJU_P051	1	1	3				Table S25. Evaluation of received results report: amount of information
LJU_P054	3	3	3					AQ2c - Amount of information
LJU_P056	1	2	3					Bin	Frequency	Cumulative %	Bin	Frequency	Cumulative %
							too little	1	0	0	3	20	0.689655
LJU_P058	1	2	3					2	2	0.0689655	4	7	0.931034
LJU_P059	1	2	3				just right	3	20	0.758621	2	2	1	69% just right
LJU_P060	3	3	4					4	7	1	1	0	1	24% little too much
LJU_P061	3	3	3				too much	5	0	1	5	0	1
LJU_P062	1	1	3					More	0	1	More	0	1
LJU_P065	1	1	3
LJU_P068	1	1	4
LJU_P076	4	3	2
LJU_P078	1	1	3
LJU_P079	1	1	3
LJU_P081	2	1	3
LJU_P082	1	1	4
31

## Sheet: p.7_AQ10
Table S26. Data on further suggestions for improving the received results report
AQ1 – Please enter your individual ID participation number e.g. LJU_S_P050 which your contact person provided (so that we can compare your answers with the sensor results)	AQ10 – How would you improve the presentation of the results you received?	AQ10-CODEs - improvement suggestions on results report							Table S27. List of further suggestions for improving the received results report
									- Web page for general public
									- better color scale for activities (now difficult to decipher)
									- activity charts should be more spaceous (now difficult to decipher)
LJU_P005									- even more simpler visualization infographics for lay people
									- more detailed results
									- comparission with other participants
LJU_P008	S predstavitvijo rezultatov sem zadovoljna, a vendarle je nekaj prostora za izboljšave: - Glede na to, da smo v raziskavi sodelovali ljudje različnih profilov oz. splošna javnost, bo morda bilo smiselno poleg poslanega poročila izdelati kakšno infografiko, ki na še bolj vizualen način približa rezultate in priporočila. - Morda bi bi bilo smiselno pripraviti tudi kakšno spletno predstavitev za šir…	even more simpler visualization infographics for lay people. Web page for general public							- introductionary video
									- spatial display of results
LJU_P012									- take into account colourblind
LJU_P013	Na določenih grafih je bilo težko razbrati aktivnosti (barvna skala je bila neustrezna).	better color scale for activities (now difficult to decipher)							- invite all participants in public dissemination event
LJU_P016	/
LJU_P018	Nič
LJU_P019	Ni potrebe.
LJU_P022	Nič bistvenega, le grafi aktivnosti so malo natlačeni in se težko loči aktivnosti med seboj.	activity charts should be more spaceous (now difficult to decipher)
LJU_P023	Bolj laično obrazloženi rezultati za posamezno osebo.	even more simpler visualization infographics for lay people
LJU_P024	Zdelo se mi je v redu.
LJU_P027
LJU_P032	Morda primerjava z ostalimi ki so prav tako sodelovali v raziskavi	comparission with other participants
LJU_P037	Osebni podatki glede na aktivnost so predstavljeni s premajhno ločljivostjo (slika 3). Bilo bi bolj informativno, da bi bili vidni vsaj še deli dneva. Sicer se da sklepati glede na spanje, ampak vseeno.	activity charts should be more spaceous (now difficult to decipher)
LJU_P044	Rezultati so predstavljeni na kratko, z vsemi potrebnimi navodili in razlagami za lažje razumevanje, z zelo nazorno grafično predstavitvijo koncentracij onesnaževal in tabelo telesne aktivnosti. Nadaljnje izboljšave se mi ne zdijo potrebne. Žal mi je samo, da so zatajili senzorji za beleženje osebne izpostavljenosti v zimskem času.
LJU_P045	predalagala bi javno predstavitev rezultatov z vabilom vsem udelezencem	invite all participants in public dissemination event
LJU_P048
LJU_P051	Uvodni video, boljši (nazornejši) grafi, natančnejši, podrobnejši izvlečki.	introductionary video, clearer graphs, more detailed results
LJU_P054	s primerjavami (relativizacijo)	comparission with other participants
LJU_P056
LJU_P058	Rezulati so prsenetljivo dobro predstavljeni. Hočem rači da sem videl/a že veliko bolj zakomplicerana poročila ki naj bi bila namenjena splošni javnosti. Edini komentar imam mogoče na to da sta pri grafu (Slika 3) rdeči barvi za kuhanje in Igranje preveč podobni in jih ne ločim na grafu. (mogoče tudi za to ker ne kuham kaj dsti in sem se zgleda samo igral/a :). V razmislek bi dodal/a da bi mogoče…	better color scale for activities, take into accoutn colourblind
LJU_P059
LJU_P060
LJU_P061
LJU_P062	Predstavitev rezultatov je bila zelo jasna.
LJU_P065
LJU_P068
LJU_P076	Koristni bi bili prostorsko orijentirani rezultati.	spatial display of reusults
LJU_P078	Hm, težko. Mislim da so avtorji odlično opravili svojo nalogo.
LJU_P079	/
LJU_P081
LJU_P082	NA
31		11	0.354839

## Sheet: p.8_BQ19
Table S28. Data on trust
BQ1 – Please enter your individual ID participation number e.g. LJU_S_P050 which your contact person provided (so that we can compare your answers with the sensor results)	BQ19 - Are you confident that your data is being handled appropriately? (1) Very unconfident…. (5) Very confident
LJU_P001	5
LJU_P002	5			Table S29. Frequency table on trust
LJU_P003	3			BQ19 Are you confident that your data is being handled appropriately
LJU_P004	5			Bin	Frequency	%
LJU_P005	5			1	0	0
LJU_P006	3			2	0	0
LJU_P007	5			3	12	0.146341
LJU_P008	4			4	20	0.243902	confident 4+5		not know or answer
LJU_P010	5			5	45	0.54878	65	0.792683	17	0.207317
LJU_P012	5			unknown	5	0.0609756
LJU_P013	5				82	1
LJU_P014	5
LJU_P015	5			Descriptive statistics (BQ19)
LJU_P016	4
LJU_P018	5			Mean	4.42857
LJU_P019	5			Standard Error	0.0855775
LJU_P020	4			Median	5
LJU_P021	4			Mode	5
LJU_P022				Standard Deviation	0.750939
LJU_P023	4			Sample Variance	0.56391
LJU_P024	5			Kurtosis	-0.639167
LJU_P025	4			Skewness	-0.89843
LJU_P026	5			Range	2
LJU_P027	5			Minimum	3
LJU_P028	5			Maximum	5
LJU_P029	5			Sum	341
LJU_P030	5			Count	77	+5=82
LJU_P031	3			Largest(1)	5
LJU_P032	4			Smallest(1)	3
LJU_P033	5			Confidence Level(95.0%)	0.170442
LJU_P034	3
LJU_P035
LJU_P036
LJU_P038	4
LJU_P039	4
LJU_P040	4
LJU_P042	5
LJU_P044	5
LJU_P045	5
LJU_P046	5
LJU_P047	5
LJU_P048	3
LJU_P049	5
LJU_P051	5
LJU_P054	3
LJU_P056	5
LJU_P057	5
LJU_P058	3
LJU_P059	3
LJU_P060	4
LJU_P061	4
LJU_P062	5
LJU_P063	5
LJU_P064	5
LJU_P065	5
LJU_P066	3
LJU_P067
LJU_P068	5
LJU_P070
LJU_P071	3
LJU_P072	3
LJU_P073	4
LJU_P074	4
LJU_P075	4
LJU_P076	5
LJU_P077	5
LJU_P078	5
LJU_P079	3
LJU_P080	5
LJU_P081	5
LJU_P082	4
LJU_P083	5
LJU_P084	5
LJU_P085	5
LJU_P086	5
LJU_P090	4
LJU_P091	4
LJU_P092	4
LJU_P093	5
LJU_P094	5
LJU_P095	4
LJU_P097	5
82
